# Supplementary material for: The role of initiator on the dispersibility of polystyrene microgels in non-aqueous solvents
Source: Colloid Polym Sci. 2017 Feb 7;295(3):479–86. doi: 10.1007/s00396-017-4023-y (PMC5321690; doi:10.1007/s00396-017-4023-y)
Supplement: Supplementary file 3 — (AUX 821 bytes) [file 396_2017_4023_MOESM3_ESM.aux]

\relax 
\citation{Atkins2002}
\citation{Atkins2002}
\@writefile{toc}{\contentsline {section}{\numberline {1}Supplementary Information: Conductivity and Mobility}{1}}
\newlabel{sec:theory}{{1}{1}}
\newlabel{eq:conductivity}{{1}{1}}
\newlabel{eq:molarcond}{{2}{1}}
\@writefile{lof}{\contentsline {figure}{\numberline {1}{\ignorespaces The possible particle charge mechanism.}}{1}}
\providecommand*\caption@xref[2]{\@setref\relax\@undefined{#1}}
\newlabel{fig:charge}{{1}{1}}
\citation{Atkins2002}
\citation{Atkins2002}
\citation{Atkins2002}
\newlabel{eq:lmc}{{3}{2}}
\newlabel{eq:molarcond2}{{4}{2}}
\newlabel{eq:mobility}{{5}{2}}
\newlabel{eq:lmc2}{{6}{2}}
\newlabel{eq:K}{{7}{2}}
\newlabel{eq:A}{{8}{2}}
\bibdata{DontDelete}
\bibcite{Atkins2002}{{1}{2002}{{Atkins and de~Paula}}{{}}}
\bibstyle{rsc}
