# Supplementary material for: The role of initiator on the dispersibility of polystyrene microgels in non-aqueous solvents
Source: Colloid Polym Sci. 2017 Feb 7;295(3):479–86. doi: 10.1007/s00396-017-4023-y (PMC5321690; doi:10.1007/s00396-017-4023-y)
Supplement: Supplementary file 4 — (LOG 16.5 KB) [file 396_2017_4023_MOESM4_ESM.log]

This is pdfTeX, Version 3.1415926-2.5-1.40.14 (MiKTeX 2.9) (preloaded format=pdflatex 2014.9.9)  14 OCT 2016 17:51
entering extended mode
**Supplementary_Info.tex

(\\chm-fs.chm.bris.ac.uk\q\jsvd\phjsvd\JessPapers\Initiators\Supplementary_Info
.tex
LaTeX2e <2011/06/27>
Babel <v3.8m> and hyphenation patterns for english, afrikaans, ancientgreek, ar
abic, armenian, assamese, basque, bengali, bokmal, bulgarian, catalan, coptic, 
croatian, czech, danish, dutch, esperanto, estonian, farsi, finnish, french, ga
lician, german, german-x-2013-05-26, greek, gujarati, hindi, hungarian, iceland
ic, indonesian, interlingua, irish, italian, kannada, kurmanji, latin, latvian,
 lithuanian, malayalam, marathi, mongolian, mongolianlmc, monogreek, ngerman, n
german-x-2013-05-26, nynorsk, oriya, panjabi, pinyin, polish, portuguese, roman
ian, russian, sanskrit, serbian, slovak, slovenian, spanish, swedish, swissgerm
an, tamil, telugu, turkish, turkmen, ukenglish, ukrainian, uppersorbian, usengl
ishmax, welsh, loaded.
("C:\Program Files (x86)\MiKTeX 2.9\tex\latex\base\article.cls"
Document Class: article 2007/10/19 v1.4h Standard LaTeX document class
("C:\Program Files (x86)\MiKTeX 2.9\tex\latex\base\size12.clo"
File: size12.clo 2007/10/19 v1.4h Standard LaTeX file (size option)
)
\c@part=\count79
\c@section=\count80
\c@subsection=\count81
\c@subsubsection=\count82
\c@paragraph=\count83
\c@subparagraph=\count84
\c@figure=\count85
\c@table=\count86
\abovecaptionskip=\skip41
\belowcaptionskip=\skip42
\bibindent=\dimen102
)
("C:\Program Files (x86)\MiKTeX 2.9\tex\latex\natbib\natbib.sty"
Package: natbib 2010/09/13 8.31b (PWD, AO)
\bibhang=\skip43
\bibsep=\skip44
LaTeX Info: Redefining \cite on input line 694.
\c@NAT@ctr=\count87
)
("C:\Program Files (x86)\MiKTeX 2.9\tex\latex\graphics\graphicx.sty"
Package: graphicx 1999/02/16 v1.0f Enhanced LaTeX Graphics (DPC,SPQR)

("C:\Program Files (x86)\MiKTeX 2.9\tex\latex\graphics\keyval.sty"
Package: keyval 1999/03/16 v1.13 key=value parser (DPC)
\KV@toks@=\toks14
)
("C:\Program Files (x86)\MiKTeX 2.9\tex\latex\graphics\graphics.sty"
Package: graphics 2009/02/05 v1.0o Standard LaTeX Graphics (DPC,SPQR)

("C:\Program Files (x86)\MiKTeX 2.9\tex\latex\graphics\trig.sty"
Package: trig 1999/03/16 v1.09 sin cos tan (DPC)
)
("C:\Program Files (x86)\MiKTeX 2.9\tex\latex\00miktex\graphics.cfg"
File: graphics.cfg 2007/01/18 v1.5 graphics configuration of teTeX/TeXLive
)
Package graphics Info: Driver file: pdftex.def on input line 91.

("C:\Program Files (x86)\MiKTeX 2.9\tex\latex\pdftex-def\pdftex.def"
File: pdftex.def 2011/05/27 v0.06d Graphics/color for pdfTeX

("C:\Program Files (x86)\MiKTeX 2.9\tex\generic\oberdiek\infwarerr.sty"
Package: infwarerr 2010/04/08 v1.3 Providing info/warning/error messages (HO)
)
("C:\Program Files (x86)\MiKTeX 2.9\tex\generic\oberdiek\ltxcmds.sty"
Package: ltxcmds 2011/11/09 v1.22 LaTeX kernel commands for general use (HO)
)
\Gread@gobject=\count88
))
\Gin@req@height=\dimen103
\Gin@req@width=\dimen104
)
("C:\Program Files (x86)\MiKTeX 2.9\tex\latex\url\url.sty"
\Urlmuskip=\muskip10
Package: url 2013/09/16  ver 3.4  Verb mode for urls, etc.
)
("C:\Program Files (x86)\MiKTeX 2.9\tex\latex\geometry\geometry.sty"
Package: geometry 2010/09/12 v5.6 Page Geometry

("C:\Program Files (x86)\MiKTeX 2.9\tex\generic\oberdiek\ifpdf.sty"
Package: ifpdf 2011/01/30 v2.3 Provides the ifpdf switch (HO)
Package ifpdf Info: pdfTeX in PDF mode is detected.
)
("C:\Program Files (x86)\MiKTeX 2.9\tex\generic\oberdiek\ifvtex.sty"
Package: ifvtex 2010/03/01 v1.5 Detect VTeX and its facilities (HO)
Package ifvtex Info: VTeX not detected.
)
("C:\Program Files (x86)\MiKTeX 2.9\tex\generic\ifxetex\ifxetex.sty"
Package: ifxetex 2010/09/12 v0.6 Provides ifxetex conditional
)
\Gm@cnth=\count89
\Gm@cntv=\count90
\c@Gm@tempcnt=\count91
\Gm@bindingoffset=\dimen105
\Gm@wd@mp=\dimen106
\Gm@odd@mp=\dimen107
\Gm@even@mp=\dimen108
\Gm@layoutwidth=\dimen109
\Gm@layoutheight=\dimen110
\Gm@layouthoffset=\dimen111
\Gm@layoutvoffset=\dimen112
\Gm@dimlist=\toks15

("C:\Program Files (x86)\MiKTeX 2.9\tex\latex\geometry\geometry.cfg"))
("C:\Program Files (x86)\MiKTeX 2.9\tex\latex\amsmath\amsmath.sty"
Package: amsmath 2013/01/14 v2.14 AMS math features
\@mathmargin=\skip45

For additional information on amsmath, use the `?' option.
("C:\Program Files (x86)\MiKTeX 2.9\tex\latex\amsmath\amstext.sty"
Package: amstext 2000/06/29 v2.01

("C:\Program Files (x86)\MiKTeX 2.9\tex\latex\amsmath\amsgen.sty"
File: amsgen.sty 1999/11/30 v2.0
\@emptytoks=\toks16
\ex@=\dimen113
))
("C:\Program Files (x86)\MiKTeX 2.9\tex\latex\amsmath\amsbsy.sty"
Package: amsbsy 1999/11/29 v1.2d
\pmbraise@=\dimen114
)
("C:\Program Files (x86)\MiKTeX 2.9\tex\latex\amsmath\amsopn.sty"
Package: amsopn 1999/12/14 v2.01 operator names
)
\inf@bad=\count92
LaTeX Info: Redefining \frac on input line 210.
\uproot@=\count93
\leftroot@=\count94
LaTeX Info: Redefining \overline on input line 306.
\classnum@=\count95
\DOTSCASE@=\count96
LaTeX Info: Redefining \ldots on input line 378.
LaTeX Info: Redefining \dots on input line 381.
LaTeX Info: Redefining \cdots on input line 466.
\Mathstrutbox@=\box26
\strutbox@=\box27
\big@size=\dimen115
LaTeX Font Info:    Redeclaring font encoding OML on input line 566.
LaTeX Font Info:    Redeclaring font encoding OMS on input line 567.
\macc@depth=\count97
\c@MaxMatrixCols=\count98
\dotsspace@=\muskip11
\c@parentequation=\count99
\dspbrk@lvl=\count100
\tag@help=\toks17
\row@=\count101
\column@=\count102
\maxfields@=\count103
\andhelp@=\toks18
\eqnshift@=\dimen116
\alignsep@=\dimen117
\tagshift@=\dimen118
\tagwidth@=\dimen119
\totwidth@=\dimen120
\lineht@=\dimen121
\@envbody=\toks19
\multlinegap=\skip46
\multlinetaggap=\skip47
\mathdisplay@stack=\toks20
LaTeX Info: Redefining \[ on input line 2665.
LaTeX Info: Redefining \] on input line 2666.
)
("C:\Program Files (x86)\MiKTeX 2.9\tex\latex\amsfonts\amssymb.sty"
Package: amssymb 2013/01/14 v3.01 AMS font symbols

("C:\Program Files (x86)\MiKTeX 2.9\tex\latex\amsfonts\amsfonts.sty"
Package: amsfonts 2013/01/14 v3.01 Basic AMSFonts support
\symAMSa=\mathgroup4
\symAMSb=\mathgroup5
LaTeX Font Info:    Overwriting math alphabet `\mathfrak' in version `bold'
(Font)                  U/euf/m/n --> U/euf/b/n on input line 106.
))
("C:\Program Files (x86)\MiKTeX 2.9\tex\latex\ulem\ulem.sty"
\UL@box=\box28
\UL@hyphenbox=\box29
\UL@skip=\skip48
\UL@hook=\toks21
\UL@height=\dimen122
\UL@pe=\count104
\UL@pixel=\dimen123
\ULC@box=\box30
Package: ulem 2012/05/18
\ULdepth=\dimen124
)
("C:\Program Files (x86)\MiKTeX 2.9\tex\latex\float\float.sty"
Package: float 2001/11/08 v1.3d Float enhancements (AL)
\c@float@type=\count105
\float@exts=\toks22
\float@box=\box31
\@float@everytoks=\toks23
\@floatcapt=\box32
)
("C:\Program Files (x86)\MiKTeX 2.9\tex\latex\caption\caption.sty"
Package: caption 2013/05/02 v3.3-89 Customizing captions (AR)

("C:\Program Files (x86)\MiKTeX 2.9\tex\latex\caption\caption3.sty"
Package: caption3 2013/05/02 v1.6-88 caption3 kernel (AR)
Package caption3 Info: TeX engine: e-TeX on input line 57.
\captionmargin=\dimen125
\captionmargin@=\dimen126
\captionwidth=\dimen127
\caption@tempdima=\dimen128
\caption@indent=\dimen129
\caption@parindent=\dimen130
\caption@hangindent=\dimen131
)
\c@ContinuedFloat=\count106
Package caption Info: float package is loaded.
)
("C:\Program Files (x86)\MiKTeX 2.9\tex\latex\tools\longtable.sty"
Package: longtable 2004/02/01 v4.11 Multi-page Table package (DPC)
\LTleft=\skip49
\LTright=\skip50
\LTpre=\skip51
\LTpost=\skip52
\LTchunksize=\count107
\LTcapwidth=\dimen132
\LT@head=\box33
\LT@firsthead=\box34
\LT@foot=\box35
\LT@lastfoot=\box36
\LT@cols=\count108
\LT@rows=\count109
\c@LT@tables=\count110
\c@LT@chunks=\count111
\LT@p@ftn=\toks24
)
("C:\Program Files (x86)\MiKTeX 2.9\tex\latex\caption\subcaption.sty"
Package: subcaption 2013/02/03 v1.1-62 Sub-captions (AR)
\c@subfigure=\count112
\c@subtable=\count113
)
("C:\Program Files (x86)\MiKTeX 2.9\tex\latex\graphics\color.sty"
Package: color 2005/11/14 v1.0j Standard LaTeX Color (DPC)

("C:\Program Files (x86)\MiKTeX 2.9\tex\latex\00miktex\color.cfg"
File: color.cfg 2007/01/18 v1.5 color configuration of teTeX/TeXLive
)
Package color Info: Driver file: pdftex.def on input line 130.
)
("C:\Program Files (x86)\MiKTeX 2.9\tex\latex\subfig\subfig.sty"
Package: subfig 2005/06/28 ver: 1.3 subfig package
\c@KVtest=\count114
\sf@farskip=\skip53
\sf@captopadj=\dimen133
\sf@capskip=\skip54
\sf@nearskip=\skip55
\sf@top=\skip56
\sf@bottom=\skip57
)
("C:\Program Files (x86)\MiKTeX 2.9\tex\latex\mwe\mwe.sty"
Package: mwe 2012/05/15 v0.3 Package to support minimal working examples (MWE)

("C:\Program Files (x86)\MiKTeX 2.9\tex\latex\lipsum\lipsum.sty"
Package: lipsum 2014/07/27 v1.3 150 paragraphs of Lorem Ipsum dummy text
\c@lips@count=\count115
)
("C:\Program Files (x86)\MiKTeX 2.9\tex\latex\blindtext\blindtext.sty"
Package: blindtext 2012/01/06 V2.0 blindtext-Package

("C:\Program Files (x86)\MiKTeX 2.9\tex\latex\tools\xspace.sty"
Package: xspace 2009/10/20 v1.13 Space after command names (DPC,MH)
)
\c@blindtext=\count116
\c@Blindtext=\count117
\c@blind@countparstart=\count118
\blind@countxx=\count119
\blindtext@numBlindtext=\count120
\blind@countyy=\count121
\c@blindlist=\count122
\c@blindlistlevel=\count123
\c@blindlist@level=\count124
\blind@listitem=\count125
\c@blind@listcount=\count126
\c@blind@levelcount=\count127
\blind@mathformula=\count128
\blind@Mathformula=\count129
\c@blind@randomcount=\count130
\c@blind@randommax=\count131
\c@blind@pangramcount=\count132
\c@blind@pangrammax=\count133
))
("C:\Program Files (x86)\MiKTeX 2.9\tex\latex\wasysym\wasysym.sty"
Package: wasysym 2003/10/30 v2.0 Wasy-2 symbol support package
\symwasy=\mathgroup6
LaTeX Font Info:    Overwriting symbol font `wasy' in version `bold'
(Font)                  U/wasy/m/n --> U/wasy/b/n on input line 90.
)
("C:\Program Files (x86)\MiKTeX 2.9\tex\latex\booktabs\booktabs.sty"
Package: booktabs 2005/04/14 v1.61803 publication quality tables
\heavyrulewidth=\dimen134
\lightrulewidth=\dimen135
\cmidrulewidth=\dimen136
\belowrulesep=\dimen137
\belowbottomsep=\dimen138
\aboverulesep=\dimen139
\abovetopsep=\dimen140
\cmidrulesep=\dimen141
\cmidrulekern=\dimen142
\defaultaddspace=\dimen143
\@cmidla=\count134
\@cmidlb=\count135
\@aboverulesep=\dimen144
\@belowrulesep=\dimen145
\@thisruleclass=\count136
\@lastruleclass=\count137
\@thisrulewidth=\dimen146
)
("C:\Program Files (x86)\MiKTeX 2.9\tex\latex\tools\array.sty"
Package: array 2008/09/09 v2.4c Tabular extension package (FMi)
\col@sep=\dimen147
\extrarowheight=\dimen148
\NC@list=\toks25
\extratabsurround=\skip58
\backup@length=\skip59
)
("C:\Program Files (x86)\MiKTeX 2.9\tex\latex\multirow\multirow.sty"
\bigstrutjot=\dimen149
)
("C:\Program Files (x86)\MiKTeX 2.9\tex\latex\base\fixltx2e.sty"
Package: fixltx2e 2006/09/13 v1.1m fixes to LaTeX
LaTeX Info: Redefining \em on input line 420.
)
("C:\Program Files (x86)\MiKTeX 2.9\tex\latex\jknappen\mathrsfs.sty"
Package: mathrsfs 1996/01/01 Math RSFS package v1.0 (jk)
\symrsfs=\mathgroup7
)
(\\chm-fs.chm.bris.ac.uk\q\jsvd\phjsvd\JessPapers\Initiators\Supplementary_Info
.aux)
LaTeX Font Info:    Checking defaults for OML/cmm/m/it on input line 30.
LaTeX Font Info:    ... okay on input line 30.
LaTeX Font Info:    Checking defaults for T1/cmr/m/n on input line 30.
LaTeX Font Info:    ... okay on input line 30.
LaTeX Font Info:    Checking defaults for OT1/cmr/m/n on input line 30.
LaTeX Font Info:    ... okay on input line 30.
LaTeX Font Info:    Checking defaults for OMS/cmsy/m/n on input line 30.
LaTeX Font Info:    ... okay on input line 30.
LaTeX Font Info:    Checking defaults for OMX/cmex/m/n on input line 30.
LaTeX Font Info:    ... okay on input line 30.
LaTeX Font Info:    Checking defaults for U/cmr/m/n on input line 30.
LaTeX Font Info:    ... okay on input line 30.
 ("C:\Program Files (x86)\MiKTeX 2.9\tex\context\base\supp-pdf.mkii"
[Loading MPS to PDF converter (version 2006.09.02).]
\scratchcounter=\count138
\scratchdimen=\dimen150
\scratchbox=\box37
\nofMPsegments=\count139
\nofMParguments=\count140
\everyMPshowfont=\toks26
\MPscratchCnt=\count141
\MPscratchDim=\dimen151
\MPnumerator=\count142
\makeMPintoPDFobject=\count143
\everyMPtoPDFconversion=\toks27
)
*geometry* driver: auto-detecting
*geometry* detected driver: pdftex
*geometry* verbose mode - [ preamble ] result:
* driver: pdftex
* paper: a4paper
* layout: <same size as paper>
* layoutoffset:(h,v)=(0.0pt,0.0pt)
* modes: 
* h-part:(L,W,R)=(72.26999pt, 452.9679pt, 72.26999pt)
* v-part:(T,H,B)=(72.26999pt, 700.50687pt, 72.26999pt)
* \paperwidth=597.50787pt
* \paperheight=845.04684pt
* \textwidth=452.9679pt
* \textheight=700.50687pt
* \oddsidemargin=0.0pt
* \evensidemargin=0.0pt
* \topmargin=-37.0pt
* \headheight=12.0pt
* \headsep=25.0pt
* \topskip=12.0pt
* \footskip=30.0pt
* \marginparwidth=35.0pt
* \marginparsep=10.0pt
* \columnsep=10.0pt
* \skip\footins=10.8pt plus 4.0pt minus 2.0pt
* \hoffset=0.0pt
* \voffset=0.0pt
* \mag=1000
* \@twocolumnfalse
* \@twosidefalse
* \@mparswitchfalse
* \@reversemarginfalse
* (1in=72.27pt=25.4mm, 1cm=28.453pt)

Package caption Info: Begin \AtBeginDocument code.
Package caption Info: subfig package v1.3 is loaded.
Package caption Info: longtable package is loaded.
("C:\Program Files (x86)\MiKTeX 2.9\tex\latex\caption\ltcaption.sty"
Package: ltcaption 2013/02/03 v1.3-62 longtable captions (AR)
)
Package caption Info: End \AtBeginDocument code.
LaTeX Font Info:    Try loading font information for U+msa on input line 46.

("C:\Program Files (x86)\MiKTeX 2.9\tex\latex\amsfonts\umsa.fd"
File: umsa.fd 2013/01/14 v3.01 AMS symbols A
)
LaTeX Font Info:    Try loading font information for U+msb on input line 46.

("C:\Program Files (x86)\MiKTeX 2.9\tex\latex\amsfonts\umsb.fd"
File: umsb.fd 2013/01/14 v3.01 AMS symbols B
)
LaTeX Font Info:    Try loading font information for U+wasy on input line 46.

("C:\Program Files (x86)\MiKTeX 2.9\tex\latex\wasysym\uwasy.fd"
File: uwasy.fd 2003/10/30 v2.0 Wasy-2 symbol font definitions
)
LaTeX Font Info:    Try loading font information for U+rsfs on input line 46.

("C:\Program Files (x86)\MiKTeX 2.9\tex\latex\jknappen\ursfs.fd"
File: ursfs.fd 1998/03/24 rsfs font definition file (jk)
)
Overfull \hbox (7.2818pt too wide) in paragraph at lines 52--52
[]\OT1/cmr/bx/n/17.28 Supplementary In-for-ma-tion: Con-duc-tiv-ity and Mo-
 []

<charges.png, id=1, 1545.52406pt x 271.76532pt>
File: charges.png Graphic file (type png)
 <use charges.png>
Package pdftex.def Info: charges.png used on input line 69.
(pdftex.def)             Requested size: 226.48395pt x 39.8217pt.
 [1

{C:/ProgramData/MiKTeX/2.9/pdftex/config/pdftex.map} <//chm-fs.chm.bris.ac.uk/q
/jsvd/phjsvd/JessPapers/Initiators/charges.png>] [2]
(\\chm-fs.chm.bris.ac.uk\q\jsvd\phjsvd\JessPapers\Initiators\Supplementary_Info
.bbl) [3

]
(\\chm-fs.chm.bris.ac.uk\q\jsvd\phjsvd\JessPapers\Initiators\Supplementary_Info
.aux) ) 
Here is how much of TeX's memory you used:
 5172 strings out of 493921
 73446 string characters out of 3144871
 238439 words of memory out of 3000000
 8360 multiletter control sequences out of 15000+200000
 15536 words of font info for 65 fonts, out of 3000000 for 9000
 841 hyphenation exceptions out of 8191
 36i,10n,38p,869b,317s stack positions out of 5000i,500n,10000p,200000b,50000s
<C:/Program Files (x86)/MiKTeX 2.9/fonts/type1/public/amsfonts/cm/cmbx12
.pfb><C:/Program Files (x86)/MiKTeX 2.9/fonts/type1/public/amsfonts/cm/cmex10.p
fb><C:/Program Files (x86)/MiKTeX 2.9/fonts/type1/public/amsfonts/cm/cmmi12.pfb
><C:/Program Files (x86)/MiKTeX 2.9/fonts/type1/public/amsfonts/cm/cmmi8.pfb><C
:/Program Files (x86)/MiKTeX 2.9/fonts/type1/public/amsfonts/cm/cmr10.pfb><C:/P
rogram Files (x86)/MiKTeX 2.9/fonts/type1/public/amsfonts/cm/cmr12.pfb><C:/Prog
ram Files (x86)/MiKTeX 2.9/fonts/type1/public/amsfonts/cm/cmr17.pfb><C:/Program
 Files (x86)/MiKTeX 2.9/fonts/type1/public/amsfonts/cm/cmr7.pfb><C:/Program Fil
es (x86)/MiKTeX 2.9/fonts/type1/public/amsfonts/cm/cmr8.pfb><C:/Program Files (
x86)/MiKTeX 2.9/fonts/type1/public/amsfonts/cm/cmsy10.pfb><C:/Program Files (x8
6)/MiKTeX 2.9/fonts/type1/public/amsfonts/cm/cmsy8.pfb><C:/Program Files (x86)/
MiKTeX 2.9/fonts/type1/public/amsfonts/cm/cmti12.pfb>
Output written on Supplementary_Info.pdf (3 pages, 251246 bytes).
PDF statistics:
 62 PDF objects out of 1000 (max. 8388607)
 0 named destinations out of 1000 (max. 500000)
 6 words of extra memory for PDF output out of 10000 (max. 10000000)
