# Supplementary material for: The role of initiator on the dispersibility of polystyrene microgels in non-aqueous solvents
Source: Colloid Polym Sci. 2017 Feb 7;295(3):479–86. doi: 10.1007/s00396-017-4023-y (PMC5321690; doi:10.1007/s00396-017-4023-y)
Supplement: Supplementary file 5 — (GZ 16.8 KB) [file 396_2017_4023_MOESM5_ESM.gz]

Archive with 1 entries (1 files):
- 396_2017_4023_MOESM5_ESM
