# Supplementary material for: The role of initiator on the dispersibility of polystyrene microgels in non-aqueous solvents
Source: Colloid Polym Sci. 2017 Feb 7;295(3):479–86. doi: 10.1007/s00396-017-4023-y (PMC5321690; doi:10.1007/s00396-017-4023-y)
Supplement: Supplementary file 5 — (GZ 16.8 KB) [file 396_2017_4023_MOESM5_ESM.gz › 396_2017_4023_MOESM5_ESM]

SyncTeX Version:1
Input:1:\\chm-fs.chm.bris.ac.uk\q\jsvd\phjsvd\JessPapers\Initiators\Supplementary_Info.tex
Input:2:C:\Program Files (x86)\MiKTeX 2.9\tex\latex\base\article.cls
Input:3:C:\Program Files (x86)\MiKTeX 2.9\tex\latex\base\size12.clo
Input:4:C:\Program Files (x86)\MiKTeX 2.9\tex\latex\natbib\natbib.sty
Input:5:C:\Program Files (x86)\MiKTeX 2.9\tex\latex\graphics\graphicx.sty
Input:6:C:\Program Files (x86)\MiKTeX 2.9\tex\latex\graphics\keyval.sty
Input:7:C:\Program Files (x86)\MiKTeX 2.9\tex\latex\graphics\graphics.sty
Input:8:C:\Program Files (x86)\MiKTeX 2.9\tex\latex\graphics\trig.sty
Input:9:C:\Program Files (x86)\MiKTeX 2.9\tex\latex\00miktex\graphics.cfg
Input:10:C:\Program Files (x86)\MiKTeX 2.9\tex\latex\pdftex-def\pdftex.def
Input:11:C:\Program Files (x86)\MiKTeX 2.9\tex\generic\oberdiek\infwarerr.sty
Input:12:C:\Program Files (x86)\MiKTeX 2.9\tex\generic\oberdiek\ltxcmds.sty
Input:13:C:\Program Files (x86)\MiKTeX 2.9\tex\latex\url\url.sty
Input:14:C:\Program Files (x86)\MiKTeX 2.9\tex\latex\geometry\geometry.sty
Input:15:C:\Program Files (x86)\MiKTeX 2.9\tex\generic\oberdiek\ifpdf.sty
Input:16:C:\Program Files (x86)\MiKTeX 2.9\tex\generic\oberdiek\ifvtex.sty
Input:17:C:\Program Files (x86)\MiKTeX 2.9\tex\generic\ifxetex\ifxetex.sty
Input:18:C:\Program Files (x86)\MiKTeX 2.9\tex\latex\geometry\geometry.cfg
Input:19:C:\Program Files (x86)\MiKTeX 2.9\tex\latex\amsmath\amsmath.sty
Input:20:C:\Program Files (x86)\MiKTeX 2.9\tex\latex\amsmath\amstext.sty
Input:21:C:\Program Files (x86)\MiKTeX 2.9\tex\latex\amsmath\amsgen.sty
Input:22:C:\Program Files (x86)\MiKTeX 2.9\tex\latex\amsmath\amsbsy.sty
Input:23:C:\Program Files (x86)\MiKTeX 2.9\tex\latex\amsmath\amsopn.sty
Input:24:C:\Program Files (x86)\MiKTeX 2.9\tex\latex\amsfonts\amssymb.sty
Input:25:C:\Program Files (x86)\MiKTeX 2.9\tex\latex\amsfonts\amsfonts.sty
Input:26:C:\Program Files (x86)\MiKTeX 2.9\tex\latex\ulem\ulem.sty
Input:27:C:\Program Files (x86)\MiKTeX 2.9\tex\latex\float\float.sty
Input:28:C:\Program Files (x86)\MiKTeX 2.9\tex\latex\caption\caption.sty
Input:29:C:\Program Files (x86)\MiKTeX 2.9\tex\latex\caption\caption3.sty
Input:30:C:\Program Files (x86)\MiKTeX 2.9\tex\latex\tools\longtable.sty
Input:31:C:\Program Files (x86)\MiKTeX 2.9\tex\latex\caption\subcaption.sty
Input:32:C:\Program Files (x86)\MiKTeX 2.9\tex\latex\graphics\color.sty
Input:33:C:\Program Files (x86)\MiKTeX 2.9\tex\latex\00miktex\color.cfg
Input:34:C:\Program Files (x86)\MiKTeX 2.9\tex\latex\subfig\subfig.sty
Input:35:C:\Program Files (x86)\MiKTeX 2.9\tex\latex\mwe\mwe.sty
Input:36:C:\Program Files (x86)\MiKTeX 2.9\tex\latex\lipsum\lipsum.sty
Input:37:C:\Program Files (x86)\MiKTeX 2.9\tex\latex\blindtext\blindtext.sty
Input:38:C:\Program Files (x86)\MiKTeX 2.9\tex\latex\tools\xspace.sty
Input:39:C:\Program Files (x86)\MiKTeX 2.9\tex\latex\wasysym\wasysym.sty
Input:40:C:\Program Files (x86)\MiKTeX 2.9\tex\latex\booktabs\booktabs.sty
Input:41:C:\Program Files (x86)\MiKTeX 2.9\tex\latex\tools\array.sty
Input:42:C:\Program Files (x86)\MiKTeX 2.9\tex\latex\multirow\multirow.sty
Input:43:C:\Program Files (x86)\MiKTeX 2.9\tex\latex\base\fixltx2e.sty
Input:44:C:\Program Files (x86)\MiKTeX 2.9\tex\latex\jknappen\mathrsfs.sty
Input:45:\\chm-fs.chm.bris.ac.uk\q\jsvd\phjsvd\JessPapers\Initiators\Supplementary_Info.aux
Input:46:C:\Program Files (x86)\MiKTeX 2.9\tex\context\base\supp-pdf.mkii
Input:47:C:\Program Files (x86)\MiKTeX 2.9\tex\latex\caption\ltcaption.sty
Input:48:C:\Program Files (x86)\MiKTeX 2.9\tex\latex\amsfonts\umsa.fd
Input:49:C:\Program Files (x86)\MiKTeX 2.9\tex\latex\amsfonts\umsb.fd
Input:50:C:\Program Files (x86)\MiKTeX 2.9\tex\latex\wasysym\uwasy.fd
Input:51:C:\Program Files (x86)\MiKTeX 2.9\tex\latex\jknappen\ursfs.fd
Output:pdf
Magnification:1000
Unit:1
X Offset:0
Y Offset:0
Content:
!3817
{1
[1,86:4736286,52610784:29685704,47874498,0
[1,86:4736286,52610784:29685704,50299330,0
[1,86:4736286,3097886:29685704,786432,0
(1,86:4736286,3097886:29685704,0,0
h1,86:4736286,3097886:29685704,0,0
)
]
[1,86:4736286,50644704:29685704,45908418,0
h1,46:4736286,5522718:0,0,0
(1,46:4736286,8701198:29685704,943900,264379
k1,46:7472104,8701198:2735818
(1,46:7472104,8701198:0,0,0
g1,46:7472104,8701198
g1,46:7472104,8701198
g1,46:7087084,8701198
(1,46:7087084,8701198:0,0,0
)
g1,46:7472104,8701198
)
x1,46:9626230,8701198
g1,46:10036560,8701198
x1,46:12476474,8701198
g1,46:12886804,8701198
x1,46:13884990,8701198
g1,46:14295320,8701198
x1,46:18804362,8701198
g1,46:19214692,8701198
x1,46:20532425,8701198
g1,46:20942755,8701198
x1,46:22670818,8701198
g1,46:23081148,8701198
x1,46:25563670,8701198
x1,46:29654296,8701198
x1,46:30277657,8701198
g1,46:30687987,8701198
x1,46:31686173,8701198
k1,46:34421990,8701198:2735817
)
(1,46:4736286,10339598:29685704,1018189,338667
k1,46:6292455,10339598:1556169
x1,46:7146328,10339598
x1,46:10183491,10339598
x1,46:13568606,10339598
g1,46:13978936,10339598
x1,46:19134175,10339598
g1,46:19544505,10339598
x1,46:20578196,10339598
g1,46:20988526,10339598
x1,46:23658953,10339598
x1,46:27994079,10339598
g1,46:28404409,10339598
x1,46:30720328,10339598
x1,46:31931545,10339598
x1,46:32865821,10339598
g1,46:32865821,10339598
k1,46:34421990,10339598:1556169
)
(1,46:4736286,12674306:29685704,833987,1533546
k1,46:6454152,12674306:1717866
h1,46:6454152,12674306:0,0,0
(1,46:6454152,12674306:26249972,833987,1533546
$1,46:6454152,12674306
[1,46:6454152,12674306:26249972,833987,1533546
(1,46:6454152,12674306:26249972,833987,353898
g1,46:6454152,12674306
(1,46:6454152,12674306:26249972,833987,353898
r1,46:6454152,12674306:0,1179648,353898
g1,46:6847368,12674306
g1,46:6847368,12674306
x1,46:10001795,12674306
g1,46:10309810,12674306
x1,46:11259198,12674306
g1,46:11567213,12674306
x1,46:14942386,12674306
$1,46:14942386,12674306
(1,46:14942386,12331839:688130,491520,0
x1,46:15597748,12331839
)
$1,46:15630516,12674306
x1,46:15887195,12674306
g1,46:16195210,12674306
x1,46:16798244,12674306
x1,46:19729523,12674306
x1,46:20140210,12674306
g1,46:20448225,12674306
x1,46:21397613,12674306
x1,46:23836067,12674306
$1,46:23836067,12674306
(1,46:23836067,12331839:360449,282168,0
x1,46:24163748,12331839
)
$1,46:24196516,12674306
x1,46:24453195,12674306
g1,46:24761210,12674306
x1,46:28226056,12674306
g1,46:28534071,12674306
x1,46:29483459,12674306
g1,46:29791474,12674306
x1,46:30394508,12674306
x1,46:31914050,12674306
$1,46:31914050,12674306
(1,46:31914050,12331839:396858,455111,0
x1,46:32278140,12331839
)
$1,46:32310908,12674306
g1,46:32310908,12674306
g1,46:32704124,12674306
)
g1,46:32704124,12674306
)
(1,46:6454152,13853954:26249972,825750,353898
g1,46:6454152,13853954
(1,46:6454152,13853954:26249972,825750,353898
r1,46:6454152,13853954:0,1179648,353898
g1,46:6847368,13853954
k1,46:13277274,13853954:6429906
x1,46:14766015,13853954
g1,46:15074030,13853954
x1,46:16780785,13853954
x1,46:17730498,13853954
g1,46:18038513,13853954
x1,46:18808551,13853954
g1,46:19116566,13853954
x1,46:19604257,13853954
x1,46:20528303,13853954
g1,46:20836318,13853954
x1,46:24006146,13853954
x1,46:25520554,13853954
$1,46:25520554,13853954
(1,46:25520554,13511487:360449,282168,0
x1,46:25848235,13511487
)
$1,46:25881003,13853954
k1,46:32310908,13853954:6429905
g1,46:32704124,13853954
)
g1,46:32704124,13853954
)
]
$1,46:32704124,12674306
)
g1,46:32704124,12674306
k1,46:34421990,12674306:1717866
)
(1,46:4736286,15498539:29685704,455111,127431
k1,46:7634724,15498539:2898438
h1,46:7634724,15498539:0,0,0
$1,46:7634724,15498539
(1,46:7634724,15260714:294003,197518,0
x1,46:7895959,15260714
)
$1,46:7928727,15498539
x1,46:8584088,15498539
x1,46:9257654,15498539
x1,46:9785585,15498539
g1,46:10004038,15498539
x1,46:10531969,15498539
g1,46:10750422,15498539
x1,46:13723214,15498539
x1,46:13850645,15498539
g1,46:14069098,15498539
x1,46:15452640,15498539
x1,46:16677800,15498539
x1,46:17005481,15498539
g1,46:17223934,15498539
x1,46:17751865,15498539
g1,46:17970318,15498539
x1,46:20078398,15498539
g1,46:20296851,15498539
x1,46:21461938,15498539
x1,46:22026277,15498539
x1,46:22335753,15498539
x1,46:23103982,15498539
g1,46:23322435,15498539
x1,46:25037296,15498539
g1,46:25255749,15498539
x1,46:27363829,15498539
g1,46:27582282,15498539
x1,46:28738268,15498539
g1,46:28956721,15498539
x1,46:30303853,15498539
g1,46:30522306,15498539
x1,46:31523553,15498539
g1,46:31523553,15498539
k1,46:34421990,15498539:2898437
)
(1,46:4736286,16284971:29685704,556402,127431
k1,46:6187015,16284971:1450729
h1,46:6187015,16284971:0,0,0
$1,46:6187015,16284971
(1,46:6187015,16047146:322220,318577,0
x1,46:6476467,16047146
)
$1,46:6509235,16284971
x1,46:7931005,16284971
g1,46:8149458,16284971
x1,46:10224767,16284971
g1,46:10443220,16284971
x1,46:12968183,16284971
g1,46:13186636,16284971
x1,46:13978532,16284971
x1,46:14306213,16284971
x1,46:14835962,16284971
g1,46:15054415,16284971
x1,46:18551494,16284971
g1,46:18769947,16284971
x1,46:22782213,16284971
x1,46:24092937,16284971
g1,46:24311390,16284971
x1,46:26315703,16284971
x1,46:27498995,16284971
x1,46:28208969,16284971
x1,46:29266650,16284971
g1,46:29557921,16284971
x1,46:30395328,16284971
g1,46:30613781,16284971
x1,46:31332857,16284971
x1,46:32971262,16284971
k1,46:34421990,16284971:1450728
)
(1,46:4736286,17071403:29685704,455111,127431
k1,46:13332272,17071403:8595986
x1,46:16190377,17071403
g1,46:16408830,17071403
x1,46:18708966,17071403
x1,46:19036647,17071403
g1,46:19255100,17071403
x1,46:20046996,17071403
x1,46:20374677,17071403
x1,46:20904426,17071403
g1,46:21122879,17071403
x1,46:24619958,17071403
g1,46:24838411,17071403
x1,46:25329932,17071403
x1,46:25826003,17071403
g1,46:25826003,17071403
k1,46:34421989,17071403:8595986
)
(1,46:4736286,17857835:29685704,491520,127431
k1,46:11649264,17857835:6912978
h1,46:11649264,17857835:0,0,0
x1,46:11976945,17857835
g1,46:12195398,17857835
x1,46:14423625,17857835
x1,46:16371507,17857835
g1,46:16589960,17857835
x1,46:18667093,17857835
g1,46:18958364,17857835
x1,46:27509012,17857835
g1,46:27509012,17857835
k1,46:34421990,17857835:6912978
)
(1,52:4736286,21336705:29685704,786431,220200
(1,52:4736286,21336705:1911028,729808,0
g1,52:4736286,21336705
x1,52:5373295,21336705
g1,52:6647314,21336705
)
x1,52:12764439,21336705
x1,52:15036571,21336705
k1,52:15319687,21336705:283116
x1,52:16501956,21336705
x1,52:18048604,21336705
x1,52:19729602,21336705
x1,52:22277639,21336705
k1,52:22773091,21336705:495452
x1,52:25038013,21336705
x1,52:27019820,21336705
x1,52:28541565,21336705
x1,52:29390911,21336705
x1,52:30027920,21336705
k1,52:30311036,21336705:283116
x1,52:32345927,21336705
k1,52:32629043,21336705:283116
x1,52:34474537,21336705
x1,52:34899210,21336705
k1,52:34899210,21336705:0
)
(1,52:6647314,22778497:27774676,786431,220200
x1,52:8062890,22778497
x1,52:8912236,22778497
x1,52:9549245,22778497
k1,52:34421989,22778497:24872744
g1,52:34421989,22778497
)
(1,57:4736286,24507556:29685704,623265,152916
x1,57:6062466,24507556
k1,56:6296595,24507556:234129
x1,56:10082625,24507556
x1,56:10467645,24507556
k1,56:10701775,24507556:234130
x1,56:11322085,24507556
k1,56:11556214,24507556:234129
x1,56:11941234,24507556
k1,56:12175363,24507556:234129
x1,56:15045901,24507556
k1,56:15284541,24507556:238640
$1,56:15284541,24507556
x1,56:15727815,24507556
$1,56:15727815,24507556
k1,56:15961944,24507556:234129
x1,56:16603644,24507556
k1,56:16837773,24507556:234129
x1,56:17265573,24507556
k1,56:17499680,24507556:234107
x1,56:18141380,24507556
$1,56:18141380,24507556
(1,56:18141380,24222166:744572,337875,54616
x1,56:18853184,24222166
)
$1,56:18885952,24507556
x1,56:19099852,24507556
k1,56:19338492,24507556:238640
x1,56:20536332,24507556
x1,56:22059300,24507556
k1,56:22293429,24507556:234129
x1,56:23106249,24507556
k1,56:23340378,24507556:234129
x1,56:24153198,24507556
x1,56:24687948,24507556
k1,56:24922077,24507556:234129
x1,56:26376597,24507556
x1,56:26761617,24507556
k1,56:26995747,24507556:234130
x1,56:28326205,24507556
k1,56:28560334,24507556:234129
x1,56:29587054,24507556
k1,56:29821183,24507556:234129
x1,56:31964461,24507556
x1,56:32242531,24507556
k1,56:32476661,24507556:234130
x1,56:33118361,24507556
k1,56:33352490,24507556:234129
x1,56:34421990,24507556
k1,56:34421990,24507556:0
)
(1,57:4736286,25457828:29685704,546132,0
x1,57:7606824,25457828
k1,57:34421990,25457828:26815166
g1,57:34421990,25457828
)
(1,58:4736286,26408100:29685704,0,0
h1,58:4736286,26408100:1155060,0,0
k1,58:34421990,26408100:28530644
g1,58:34421990,26408100
)
(1,61:18036945,27358372:16385045,589824,196608
(1,61:18036945,27358372:3084386,537395,152916
x1,61:18480219,27358372
g1,61:18698669,27358372
x1,61:19297589,27358372
g1,61:19516039,27358372
x1,61:20050516,27358372
(1,61:20050516,27476336:525508,225735,0
x1,61:20543256,27476336
)
x1,61:20907431,27358372
(1,61:20907431,27358372:213900,76458,152916
(1,59:20907431,27358372:213900,76458,152916
x1,59:21121331,27358372
)
)
)
(1,61:33438050,27358372:983940,589824,196608
(1,61:33438050,27358372:983940,589824,196608
x1,61:34122530,27358372
x1,61:34421990,27358372
)
)
)
(1,64:4736286,28734628:29685704,546132,152916
h1,63:4736286,28734628:1155060,0,0
x1,63:7859226,28734628
k1,63:8130426,28734628:271200
$1,63:8130426,28734628
x1,63:8664903,28734628
(1,63:8664903,28852592:525508,225735,0
x1,63:9157643,28852592
)
$1,63:9190411,28734628
k1,63:9461611,28734628:271200
x1,63:9979249,28734628
k1,63:10250449,28734628:271200
x1,63:11319949,28734628
k1,63:11591148,28734628:271199
x1,63:13516248,28734628
k1,63:13787448,28734628:271200
x1,63:17573478,28734628
x1,63:17958498,28734628
k1,63:18229698,28734628:271200
x1,63:18850008,28734628
k1,63:19121208,28734628:271200
x1,63:20190708,28734628
k1,63:20461908,28734628:271200
x1,63:23118546,28734628
k1,63:23389746,28734628:271200
x1,63:24630366,28734628
k1,63:24901566,28734628:271200
$1,63:24901566,28734628
x1,63:25232973,28734628
$1,63:25232973,28734628
k1,63:25504173,28734628:271200
x1,63:26021811,28734628
k1,63:26293010,28734628:271199
x1,63:27362510,28734628
k1,63:27633710,28734628:271200
x1,63:29901050,28734628
x1,63:32189780,28734628
k1,63:32460980,28734628:271200
x1,63:33081290,28734628
k1,63:33352490,28734628:271200
x1,63:34421990,28734628
k1,63:34421990,28734628:0
)
(1,64:4736286,29684900:29685704,623265,152916
x1,64:8222856,29684900
$1,63:8288392,29684900
(1,63:8288392,29399510:311300,337875,0
(1,63:8288392,29399510:278532,337875,0
x1,63:8566924,29399510
)
)
$1,63:8599692,29684900
x1,63:8813592,29684900
k1,64:34421990,29684900:25608398
g1,64:34421990,29684900
)
(1,66:4736286,30635172:29685704,546132,152916
h1,65:4736286,30635172:1155060,0,0
$1,65:5891346,30635172
x1,65:6425823,30635172
(1,65:6425823,30753136:525508,225735,0
x1,65:6918563,30753136
)
$1,65:6951331,30635172
k1,65:7188724,30635172:237393
x1,65:7595134,30635172
x1,65:9096712,30635172
k1,65:9334105,30635172:237393
x1,65:10831405,30635172
k1,65:11068798,30635172:237393
x1,65:12223858,30635172
x1,65:12908338,30635172
x1,65:13336138,30635172
x1,65:14298688,30635172
x1,65:15838768,30635172
k1,65:16174579,30635172:335811
x1,65:17543539,30635172
k1,65:17780931,30635172:237392
x1,65:18807651,30635172
x1,65:19924209,30635172
k1,65:20161602,30635172:237393
x1,65:21081372,30635172
k1,65:21318765,30635172:237393
x1,65:22563663,30635172
k1,65:22801056,30635172:237393
x1,65:23318694,30635172
k1,65:23556087,30635172:237393
x1,65:24967827,30635172
k1,65:25205220,30635172:237393
x1,65:26274720,30635172
k1,65:26512113,30635172:237393
x1,65:27842571,30635172
k1,65:28079963,30635172:237392
x1,65:28892783,30635172
k1,65:29130176,30635172:237393
x1,65:30242456,30635172
k1,65:30479849,30635172:237393
x1,65:31078769,30635172
x1,65:31634909,30635172
x1,65:31998539,30635172
x1,65:32687297,30635172
k1,65:32924690,30635172:237393
x1,65:34421990,30635172
k1,65:34421990,30635172:0
)
(1,66:4736286,31585444:29685704,546132,152916
x1,66:5763006,31585444
x1,66:6661386,31585444
k1,65:6969900,31585444:308514
x1,65:7611600,31585444
k1,65:7920113,31585444:308513
x1,65:8608871,31585444
x1,65:9250571,31585444
x1,65:10790651,31585444
k1,65:11288392,31585444:497741
x1,65:11790921,31585444
x1,65:12411231,31585444
k1,65:12719745,31585444:308514
x1,65:14820243,31585444
k1,65:15128756,31585444:308513
x1,65:16369376,31585444
x1,65:19132964,31585444
k1,65:19454436,31585444:321472
x1,65:21422316,31585444
k1,65:21730830,31585444:308514
x1,65:22890168,31585444
x1,65:25294404,31585444
k1,65:25602917,31585444:308513
x1,65:26629637,31585444
k1,65:26938151,31585444:308514
x1,65:28435451,31585444
k1,65:28743964,31585444:308513
x1,65:29770684,31585444
x1,65:31310764,31585444
k1,65:31632236,31585444:321472
x1,65:32701736,31585444
k1,65:33010250,31585444:308514
x1,65:34165310,31585444
x1,65:34421990,31585444
k1,66:34421990,31585444:0
)
(1,66:4736286,32535716:29685704,546132,152916
x1,66:5934126,32535716
x1,66:6853896,32535716
x1,66:7367256,32535716
x1,66:7752276,32535716
k1,65:7975959,32535716:223683
x1,65:8745999,32535716
x1,65:9173799,32535716
x1,65:10696767,32535716
k1,65:10920450,32535716:223683
x1,65:12353580,32535716
k1,65:12577263,32535716:223683
x1,65:14121621,32535716
x1,65:15020001,32535716
k1,65:15243684,32535716:223683
x1,65:16056504,32535716
k1,65:16280187,32535716:223683
x1,65:17349687,32535716
k1,65:17573369,32535716:223682
x1,65:18600089,32535716
x1,65:19498469,32535716
k1,65:19722152,32535716:223683
x1,65:20877212,32535716
x1,65:21561692,32535716
x1,65:21989492,32535716
x1,65:22952042,32535716
x1,65:24278222,32535716
k1,65:24501905,32535716:223683
x1,65:27158543,32535716
k1,65:27382226,32535716:223683
x1,65:28301996,32535716
k1,65:28525679,32535716:223683
x1,65:29081819,32535716
x1,65:30194099,32535716
k1,65:30417782,32535716:223683
x1,65:31658402,32535716
x1,65:34421990,32535716
k1,65:34421990,32535716:0
)
(1,66:4736286,33485988:29685704,546132,152916
x1,66:6704166,33485988
k1,65:6922463,33485988:218297
x1,65:8081801,33485988
x1,65:10486037,33485988
k1,65:10704333,33485988:218296
x1,65:11731053,33485988
k1,65:11949350,33485988:218297
x1,65:13061630,33485988
k1,65:13279926,33485988:218296
x1,65:14777226,33485988
k1,65:14995523,33485988:218297
x1,65:16022243,33485988
x1,65:17562323,33485988
k1,65:17788296,33485988:225973
x1,65:18857796,33485988
k1,65:19076093,33485988:218297
x1,65:20231153,33485988
x1,65:21428993,33485988
x1,65:22348763,33485988
x1,65:22862123,33485988
x1,65:23247143,33485988
k1,65:23465439,33485988:218296
x1,65:23983077,33485988
k1,65:24201374,33485988:218297
x1,65:26276204,33485988
k1,65:26494500,33485988:218296
x1,65:27264540,33485988
x1,65:27692340,33485988
x1,65:28483770,33485988
x1,65:29681610,33485988
x1,65:29959680,33485988
k1,65:30177977,33485988:218297
x1,65:30990797,33485988
k1,65:31209093,33485988:218296
x1,65:32278593,33485988
k1,65:32496890,33485988:218297
x1,65:33523610,33485988
x1,65:34421990,33485988
k1,65:34421990,33485988:0
)
(1,66:4736286,34436260:29685704,623265,152916
x1,66:5891346,34436260
x1,66:6575826,34436260
x1,66:7003626,34436260
x1,66:7966176,34436260
x1,66:9292356,34436260
$1,65:9357892,34436260
(1,65:9357892,34150870:311300,337875,0
(1,65:9357892,34150870:278532,337875,0
x1,65:9636424,34150870
)
)
$1,65:9669192,34436260
x1,65:9883092,34436260
k1,65:10350784,34436260:467692
x1,65:10906924,34436260
x1,65:11227774,34436260
k1,65:11526271,34436260:298497
x1,65:13451371,34436260
k1,65:13749868,34436260:298497
x1,65:14819368,34436260
k1,65:15117865,34436260:298497
x1,65:15866515,34436260
x1,65:16936015,34436260
x1,65:17214085,34436260
k1,65:17512582,34436260:298497
x1,65:18132892,34436260
k1,65:18431389,34436260:298497
x1,65:18773629,34436260
x1,65:20249539,34436260
x1,65:21276259,34436260
k1,65:21574757,34436260:298498
x1,65:22216457,34436260
k1,65:22514954,34436260:298497
x1,65:23584454,34436260
k1,65:23882951,34436260:298497
x1,65:24738551,34436260
x1,65:25765271,34436260
x1,65:26706431,34436260
k1,65:27004928,34436260:298497
x1,65:28335386,34436260
x1,65:29836964,34436260
k1,65:30145916,34436260:308952
x1,65:30787616,34436260
k1,65:31086113,34436260:298497
x1,65:32155613,34436260
k1,65:32454110,34436260:298497
x1,65:33395270,34436260
x1,65:34165310,34436260
x1,65:34421990,34436260
k1,66:34421990,34436260:0
)
(1,66:4736286,35386532:29685704,546132,152916
x1,66:5335206,35386532
x1,66:6965124,35386532
k1,65:7225339,35386532:260215
x1,65:8637079,35386532
k1,65:8897294,35386532:260215
x1,65:9731504,35386532
x1,65:10330424,35386532
x1,65:11079074,35386532
k1,65:11340172,35386532:261098
x1,65:11853532,35386532
k1,65:12113747,35386532:260215
x1,65:12631385,35386532
k1,65:12891600,35386532:260215
x1,65:13580358,35386532
x1,65:15723636,35386532
k1,65:15983851,35386532:260215
x1,65:17395591,35386532
k1,65:17655805,35386532:260214
x1,65:18297505,35386532
k1,65:18557720,35386532:260215
x1,65:20055020,35386532
x1,65:22733048,35386532
k1,65:22993263,35386532:260215
x1,65:23895921,35386532
x1,65:24302331,35386532
x1,65:25050981,35386532
x1,65:25846689,35386532
k1,65:26107788,35386532:261099
x1,65:26920608,35386532
k1,65:27180822,35386532:260214
x1,65:28250322,35386532
k1,65:28510537,35386532:260215
x1,65:29366137,35386532
x1,65:30392857,35386532
x1,65:31334017,35386532
k1,65:31594232,35386532:260215
x1,65:32706512,35386532
x1,65:33219872,35386532
x1,65:34421990,35386532
k1,65:34421990,35386532:0
)
(1,66:4736286,36336804:29685704,546132,152916
x1,66:6622884,36336804
g1,65:6879564,36336804
x1,65:8376864,36336804
g1,65:8633544,36336804
x1,65:9189684,36336804
x1,65:10558644,36336804
g1,65:10815324,36336804
x1,65:11200344,36336804
g1,65:11457024,36336804
x1,65:12440964,36336804
g1,65:12697644,36336804
x1,65:13382124,36336804
g1,65:13638804,36336804
x1,65:13895484,36336804
x1,65:14280504,36336804
g1,65:14537184,36336804
x1,65:14879424,36336804
x1,65:16911474,36336804
g1,65:17168154,36336804
x1,65:18156372,36336804
g1,65:18413052,36336804
x1,65:19728401,36336804
g1,65:20070641,36336804
x1,65:20455661,36336804
h1,65:20455661,36336804:0,0,0
x1,65:20669561,36336804
k1,66:34421990,36336804:13752429
g1,66:34421990,36336804
)
(1,75:4736286,37287076:29685704,546132,152916
h1,74:4736286,37287076:1155060,0,0
x1,74:8650383,37287076
k1,74:8897239,37287076:246856
x1,74:11040517,37287076
k1,74:11287373,37287076:246856
x1,74:12699113,37287076
k1,74:12945968,37287076:246855
$1,74:12945968,37287076
x1,74:13480445,37287076
(1,74:13480445,37405040:525508,225735,0
x1,74:13973185,37405040
)
$1,74:14005953,37287076
k1,74:14252809,37287076:246856
x1,74:15450649,37287076
x1,74:16973617,37287076
k1,74:17220473,37287076:246856
x1,74:18033293,37287076
k1,74:18280149,37287076:246856
x1,74:20547489,37287076
x1,74:22836219,37287076
k1,74:23083075,37287076:246856
x1,74:23600713,37287076
k1,74:23847569,37287076:246856
x1,74:25045409,37287076
k1,74:25292264,37287076:246855
x1,74:25976744,37287076
k1,74:26223600,37287076:246856
x1,74:26865300,37287076
x1,74:30142248,37287076
k1,74:30389104,37287076:246856
x1,74:30816904,37287076
x1,74:31479994,37287076
x1,74:32014744,37287076
x1,74:33105634,37287076
k1,74:33352490,37287076:246856
x1,74:34421990,37287076
k1,74:34421990,37287076:0
)
(1,75:4736286,38237348:29685704,546132,152916
x1,75:7777944,38237348
k1,74:8368154,38237348:590210
x1,74:8870683,38237348
x1,74:9490993,38237348
k1,74:9830330,38237348:339337
x1,74:11930828,38237348
k1,74:12270165,38237348:339337
x1,74:16060473,38237348
k1,74:16399809,38237348:339336
x1,74:17084289,38237348
k1,74:17423626,38237348:339337
x1,74:18022546,38237348
x1,74:18557296,38237348
k1,74:18896633,38237348:339337
x1,74:21163973,38237348
x1,74:23970341,38237348
k1,74:24330342,38237348:360001
x1,74:25399842,38237348
k1,74:25739179,38237348:339337
x1,74:27664279,38237348
k1,74:28003615,38237348:339336
x1,74:31789645,38237348
x1,74:32174665,38237348
k1,74:32514002,38237348:339337
x1,74:32920412,38237348
x1,74:34421990,38237348
k1,74:34421990,38237348:0
)
(1,75:4736286,39187620:29685704,546132,152916
x1,75:7238916,39187620
g1,74:7495596,39187620
x1,74:8992896,39187620
g1,74:9249576,39187620
x1,74:10319076,39187620
g1,74:10575756,39187620
x1,74:12740424,39187620
g1,74:12997104,39187620
x1,74:13681584,39187620
x1,74:14387454,39187620
g1,74:14644134,39187620
x1,74:15264444,39187620
g1,74:15521124,39187620
x1,74:17788464,39187620
x1,74:20291094,39187620
g1,74:20547774,39187620
x1,74:21236532,39187620
g1,74:21493212,39187620
x1,74:23850390,39187620
x1,74:24641820,39187620
g1,74:24898500,39187620
x1,74:25326300,39187620
x1,74:25711320,39187620
g1,74:25968000,39187620
x1,74:29351625,39187620
x1,74:30275673,39187620
g1,74:30532353,39187620
x1,74:31131273,39187620
x1,74:31879923,39187620
k1,75:34421990,39187620:2542067
g1,75:34421990,39187620
)
(1,76:4736286,40137892:29685704,0,0
h1,76:4736286,40137892:1155060,0,0
k1,76:34421990,40137892:28530644
g1,76:34421990,40137892
)
(1,79:16458009,41088164:17963981,717927,196608
(1,79:16458009,41088164:6242258,717927,194419
x1,79:16992486,41088164
(1,79:16992486,41206128:525508,225735,0
x1,79:17485226,41206128
)
g1,79:17736444,41088164
x1,79:18335364,41088164
g1,79:18553814,41088164
x1,79:19088291,41088164
[1,79:19088291,41282583:525508,758520,0
(1,79:19088291,40763453:311300,239390,0
x1,79:19366823,40763453
)
(1,79:19088291,41282583:525508,225735,0
x1,79:19581031,41282583
)
]
g1,79:19788559,41088164
x1,79:20400230,41088164
g1,79:20574990,41088164
x1,79:21230118,41088164
x1,79:21618003,41088164
(1,79:21618003,40763453:868364,393216,131072
x1,79:22453599,40763453
)
(1,79:22486367,41088164:213900,76458,152916
(1,77:22486367,41088164:213900,76458,152916
x1,77:22700267,41088164
)
)
)
(1,79:33438050,41088164:983940,589824,196608
(1,79:33438050,41088164:983940,589824,196608
x1,79:34122530,41088164
x1,79:34421990,41088164
)
)
)
(1,82:4736286,42464420:29685704,546132,194419
h1,81:4736286,42464420:1155060,0,0
x1,81:7859226,42464420
k1,81:8148738,42464420:289512
$1,81:8148738,42464420
x1,81:8803866,42464420
$1,81:8860344,42464420
k1,81:9149856,42464420:289512
x1,81:9667494,42464420
k1,81:9957006,42464420:289512
x1,81:11026506,42464420
k1,81:11316018,42464420:289512
x1,81:14909538,42464420
k1,81:15199050,42464420:289512
x1,81:17359440,42464420
k1,81:17800177,42464420:440737
$1,81:17800177,42464420
x1,81:18334654,42464420
[1,81:18334654,42658839:525508,719199,0
(1,81:18334654,42179030:311300,239390,0
x1,81:18613186,42179030
)
(1,81:18334654,42658839:525508,225735,0
x1,81:18827394,42658839
)
]
$1,81:18860162,42464420
k1,81:19149674,42464420:289512
x1,81:19667312,42464420
k1,81:19956824,42464420:289512
x1,81:21026324,42464420
k1,81:21315836,42464420:289512
x1,81:23925416,42464420
k1,81:24214928,42464420:289512
x1,81:26140028,42464420
k1,81:26429540,42464420:289512
x1,81:30215570,42464420
x1,81:30600590,42464420
x1,81:30750320,42464420
k1,81:31048040,42464420:297720
x1,81:31818080,42464420
x1,81:33443720,42464420
k1,81:33733232,42464420:289512
x1,81:34421990,42464420
k1,81:34421990,42464420:0
)
(1,82:4736286,43414692:29685704,546132,152916
x1,82:5805786,43414692
k1,81:6130045,43414692:324259
x1,81:8055145,43414692
k1,81:8379403,43414692:324258
x1,81:12165433,43414692
x1,81:12550453,43414692
k1,81:12874712,43414692:324259
x1,81:13516412,43414692
k1,81:13840670,43414692:324258
x1,81:14910170,43414692
k1,81:15234429,43414692:324259
x1,81:16817289,43414692
k1,81:17141547,43414692:324258
x1,81:17761857,43414692
k1,81:18086116,43414692:324259
x1,81:19455076,43414692
k1,81:19779335,43414692:324259
x1,81:22046675,43414692
x1,81:24335405,43414692
k1,81:24659663,43414692:324258
x1,81:25900283,43414692
k1,81:26224542,43414692:324259
x1,81:27379602,43414692
k1,81:27703860,43414692:324258
x1,81:28131660,43414692
x1,81:28495290,43414692
k1,81:28819549,43414692:324259
x1,81:32015215,43414692
k1,81:32339473,43414692:324258
x1,81:33028231,43414692
k1,81:33352490,43414692:324259
x1,81:34421990,43414692
k1,81:34421990,43414692:0
)
(1,82:4736286,44364964:29685704,546132,0
x1,82:6109524,44364964
g1,81:6366204,44364964
x1,81:6986514,44364964
g1,81:7243194,44364964
x1,81:8398254,44364964
x1,81:11675202,44364964
g1,81:11931882,44364964
x1,81:13493352,44364964
g1,81:13750032,44364964
x1,81:17108262,44364964
g1,81:17364942,44364964
x1,81:18909300,44364964
k1,82:34421990,44364964:15512690
g1,82:34421990,44364964
)
[1,72:4736286,49841918:29685704,4166234,0
[1,72:4736286,49841918:29685704,4166234,0
(1,70:4736286,48285439:29685704,2609755,0
k1,70:12157712,48285439:7421426
h1,69:12157712,48285439:0,0,0
(1,69:12157712,48285439:14842852,2609755,0
(1,69:12157712,48285439:14841667,2609762,0
(1,69:12157712,48285439:14841667,2609762,0
(1,69:12157712,48285439:0,17810412,0
(1,69:12157712,48285439:101287465,17810412,0
)
k1,69:12157713,48285439:-101287464
)
)
)
)
g1,70:27000564,48285439
k1,70:34421990,48285439:7421426
)
(1,70:4736286,49605986:29685704,665187,235932
h1,70:4736286,49605986:0,0,0
g1,70:4736286,49605986
[1,70:4736286,49605986:29685704,665187,235932
(1,70:4736286,49605986:29685704,665187,235932
h1,70:4736286,49605986:0,0,0
x1,70:6907235,49605986
k1,70:7146398,49605986:239163
x1,70:7745318,49605986
k1,70:8078800,49605986:333482
r1,70:8078800,49605986:0,901119,235932
k1,70:8078800,49605986:0
x1,70:8570321,49605986
k1,70:8773851,49605986:203530
x1,70:10232030,49605986
x1,70:10942006,49605986
k1,70:11145550,49605986:203544
x1,70:11673481,49605986
k1,70:11877026,49605986:203545
x1,70:12787250,49605986
k1,70:12990795,49605986:203545
x1,70:13354885,49605986
x1,70:15237228,49605986
k1,70:15440773,49605986:203545
x1,70:15732044,49605986
x1,70:17863790,49605986
k1,70:18067334,49605986:203544
x1,70:19196011,49605986
x1,70:21220350,49605986
k1,70:21423895,49605986:203545
x1,70:21951826,49605986
k1,70:22155371,49605986:203545
x1,70:24560183,49605986
k1,70:24763728,49605986:203545
x1,70:27283229,49605986
k1,70:27486773,49605986:203544
x1,70:28032908,49605986
k1,70:28236453,49605986:203545
x1,70:29510767,49605986
x1,70:31789968,49605986
k1,70:31993513,49605986:203545
x1,70:33107628,49605986
x1,70:33744784,49605986
x1,70:34421990,49605986
r1,70:34421990,49605986:0,235932,235932
k1,70:34421990,49605986:0
k1,70:34421990,49605986:0
)
]
g1,70:34421990,49605986
g1,70:34421990,49605986
)
]
]
]
(1,86:4736286,52610784:29685704,506811,0
(1,86:4736286,52610784:29685704,506811,0
k1,86:19386628,52610784:14650342
x1,86:19771648,52610784
k1,86:34421990,52610784:14650342
)
)
]
]
!26275
}1
!10
{2
[1,189:4736286,52610784:29685704,47874498,0
[1,189:4736286,52610784:29685704,50299330,0
[1,189:4736286,3097886:29685704,786432,0
(1,189:4736286,3097886:29685704,0,0
h1,189:4736286,3097886:29685704,0,0
)
]
[1,189:4736286,50644704:29685704,45908418,0
(1,83:4736286,5522718:29685704,0,0
h1,83:4736286,5522718:1155060,0,0
k1,83:34421990,5522718:28530644
g1,83:34421990,5522718
)
(1,86:16111233,6472990:18310757,589824,196608
(1,86:16111233,6472990:6935811,564101,194419
x1,86:16645710,6472990
[1,86:16645710,6667409:525508,758520,0
(1,86:16645710,6148279:311300,239390,0
x1,86:16924242,6148279
)
(1,86:16645710,6667409:525508,225735,0
x1,86:17138450,6667409
)
]
g1,86:17389668,6472990
x1,86:17988588,6472990
g1,86:18207038,6472990
x1,86:18579314,6472990
(1,86:18579314,6590954:466040,316760,54616
x1,86:19012586,6590954
)
x1,86:19579831,6472990
(1,86:19579831,6590954:466040,316760,54616
x1,86:20013103,6590954
)
g1,86:20220631,6472990
x1,86:20819551,6472990
g1,86:20994311,6472990
x1,86:21366587,6472990
(1,86:21366587,6590954:466040,316760,54616
x1,86:21799859,6590954
)
x1,86:22367104,6472990
(1,86:22367104,6590954:466040,316760,54616
x1,86:22800376,6590954
)
(1,86:22833144,6472990:213900,76458,152916
(1,84:22833144,6472990:213900,76458,152916
x1,84:23047044,6472990
)
)
)
(1,86:33438050,6472990:983940,589824,196608
(1,86:33438050,6472990:983940,589824,196608
x1,86:34122530,6472990
x1,86:34421990,6472990
)
)
)
(1,90:4736286,7849246:29685704,546132,172580
h1,88:4736286,7849246:1155060,0,0
x1,88:7859226,7849246
k1,88:8112363,7849246:253137
$1,88:8112363,7849246
x1,88:8646840,7849246
(1,88:8646840,7967210:466040,316760,54616
x1,88:9080112,7967210
)
$1,88:9112880,7849246
k1,88:9366017,7849246:253137
x1,88:10606637,7849246
k1,88:10859774,7849246:253137
$1,88:10859774,7849246
x1,88:11394251,7849246
(1,88:11394251,7967210:466040,316760,54616
x1,88:11827523,7967210
)
$1,88:11860291,7849246
k1,88:12113427,7849246:253136
x1,88:13140147,7849246
k1,88:13393284,7849246:253137
x1,88:14462784,7849246
k1,88:14715921,7849246:253137
x1,88:17325501,7849246
k1,88:17578638,7849246:253137
x1,88:19503738,7849246
k1,88:19756875,7849246:253137
x1,88:24402783,7849246
k1,88:24655920,7849246:253137
x1,88:25276230,7849246
k1,88:25529367,7849246:253137
x1,88:26598867,7849246
k1,88:26852003,7849246:253136
x1,88:29209181,7849246
k1,88:29462318,7849246:253137
x1,88:30702938,7849246
k1,88:30956075,7849246:253137
x1,88:32025575,7849246
k1,88:32278712,7849246:253137
x1,88:34421990,7849246
k1,88:34421990,7849246:0
)
(1,90:4736286,8799518:29685704,546132,172580
x1,90:6109524,8799518
x1,88:7735164,8799518
x1,88:8676324,8799518
k1,88:8985263,8799518:308939
x1,88:10225883,8799518
k1,88:10534821,8799518:308938
$1,88:10534821,8799518
x1,88:10907097,8799518
(1,88:10907097,8917482:466040,316760,54616
x1,88:11340369,8917482
)
$1,88:11373137,8799518
k1,88:11682076,8799518:308939
x1,88:12922696,8799518
k1,88:13231635,8799518:308939
$1,88:13231635,8799518
x1,88:13603911,8799518
(1,88:13603911,8917482:466040,316760,54616
x1,88:14037183,8917482
)
$1,88:14069951,8799518
k1,88:14378889,8799518:308938
x1,88:15405609,8799518
k1,88:15714548,8799518:308939
x1,88:16784048,8799518
k1,88:17092987,8799518:308939
x1,88:17520787,8799518
x1,88:18568897,8799518
x1,88:18975307,8799518
x1,88:19942135,8799518
k1,88:20251073,8799518:308938
x1,88:20871383,8799518
k1,88:21180322,8799518:308939
x1,88:23537500,8799518
k1,88:23846439,8799518:308939
x1,88:25087059,8799518
k1,88:25395997,8799518:308938
x1,88:27539275,8799518
k1,88:27848214,8799518:308939
x1,88:28276014,8799518
x1,88:28939104,8799518
k1,88:29248043,8799518:308939
x1,88:30809513,8799518
x1,88:31814843,8799518
k1,88:32123781,8799518:308938
x1,88:33492741,8799518
k1,88:33801680,8799518:308939
x1,88:34421990,8799518
k1,88:34421990,8799518:0
)
(1,90:4736286,9749790:29685704,546132,152916
x1,90:8436756,9749790
k1,88:8872643,9749790:435887
x1,88:10198823,9749790
k1,89:10486718,9749790:287895
x1,89:13096298,9749790
k1,89:13384194,9749790:287896
x1,89:15309294,9749790
k1,89:15597189,9749790:287895
x1,89:20243097,9749790
k1,89:20530993,9749790:287896
x1,89:21151303,9749790
k1,89:21439199,9749790:287896
x1,89:22769657,9749790
k1,89:23057552,9749790:287895
x1,89:24212612,9749790
k1,89:24500508,9749790:287896
x1,89:24928308,9749790
x1,89:25291938,9749790
k1,89:25579833,9749790:287895
x1,89:29344473,9749790
k1,89:29632369,9749790:287896
x1,89:31193839,9749790
k1,89:31481734,9749790:287895
x1,89:32551234,9749790
k1,89:32839130,9749790:287896
x1,89:34421990,9749790
k1,89:34421990,9749790:0
)
(1,90:4736286,10700062:29685704,589824,196608
x1,90:7991844,10700062
g1,89:8248524,10700062
x1,89:8547984,10700062
$1,89:8547984,10700062
x1,89:9011283,10700062
(1,89:9011283,10818026:222426,346600,0
x1,89:9200941,10818026
)
$1,89:9233709,10700062
x1,89:9533169,10700062
g1,89:9789849,10700062
x1,89:11762007,10700062
k1,90:34421991,10700062:22659984
g1,90:34421991,10700062
)
(1,91:4736286,11650334:29685704,0,0
h1,91:4736286,11650334:1155060,0,0
k1,91:34421990,11650334:28530644
g1,91:34421990,11650334
)
(1,94:17841216,12600606:16580774,589824,196608
(1,94:17841216,12600606:3475845,537395,152916
x1,94:18375693,12600606
g1,94:18594143,12600606
x1,94:19193063,12600606
g1,94:19411513,12600606
x1,94:19783789,12600606
x1,94:20275305,12600606
(1,94:20275305,12718570:222426,346600,0
x1,94:20464963,12718570
)
x1,94:20996211,12600606
(1,94:21103161,12600606:213900,76458,152916
(1,92:21103161,12600606:213900,76458,152916
x1,92:21317061,12600606
)
)
)
(1,94:33438050,12600606:983940,589824,196608
(1,94:33438050,12600606:983940,589824,196608
x1,94:34122530,12600606
x1,94:34421990,12600606
)
)
)
(1,97:4736286,13976862:29685704,546132,152916
h1,96:4736286,13976862:1155060,0,0
x1,96:7859226,13976862
k1,96:8133098,13976862:273872
$1,96:8133098,13976862
x1,96:8505374,13976862
$1,96:8533591,13976862
k1,96:8807463,13976862:273872
x1,96:9325101,13976862
k1,96:9598974,13976862:273873
x1,96:10668474,13976862
k1,96:10942346,13976862:273872
x1,96:11348756,13976862
x1,96:13423586,13976862
k1,96:13697458,13976862:273872
x1,96:14317768,13976862
k1,96:14591640,13976862:273872
x1,96:15661140,13976862
k1,96:15935012,13976862:273872
x1,96:17479370,13976862
k1,96:17873187,13976862:393817
x1,96:18375716,13976862
x1,96:20193866,13976862
x1,96:21096524,13976862
k1,96:21370396,13976862:273872
x1,96:23941474,13976862
x1,96:24219544,13976862
k1,96:24493416,13976862:273872
x1,96:25011054,13976862
k1,96:25284926,13976862:273872
x1,96:26054966,13976862
x1,96:27680606,13976862
k1,96:27954478,13976862:273872
x1,96:28643236,13976862
k1,96:28917109,13976862:273873
$1,96:28917109,13976862
x1,96:29415589,13976862
k1,96:29770252,13976862:247713
x1,96:30369172,13976862
k1,96:30616885,13976862:247713
x1,96:31233511,13976862
(1,96:31233511,14094826:589832,225735,0
x1,96:31512043,14094826
x1,96:31790575,14094826
)
x1,96:32180238,13976862
$1,96:32180238,13976862
k1,96:32454110,13976862:273872
x1,96:34421990,13976862
k1,96:34421990,13976862:0
)
(1,97:4736286,14927134:29685704,546132,152916
$1,97:4736286,14927134
x1,97:5352912,14927134
(1,96:5352912,15045098:589832,225735,0
x1,96:5631444,15045098
x1,96:5909976,15045098
)
$1,96:5942744,14927134
k1,96:6312609,14927134:369865
x1,96:6830247,14927134
k1,96:7200113,14927134:369866
x1,96:8183780,14927134
x1,96:10925978,14927134
k1,96:11295843,14927134:369865
x1,96:11723643,14927134
x1,96:12771753,14927134
x1,96:13178163,14927134
x1,96:13841253,14927134
k1,96:14211119,14927134:369866
x1,96:15451739,14927134
k1,96:15821604,14927134:369865
$1,96:15821604,14927134
x1,96:16178499,14927134
$1,96:16178499,14927134
k1,96:16548365,14927134:369866
x1,96:17066003,14927134
k1,96:17435868,14927134:369865
x1,96:18505368,14927134
k1,96:18875233,14927134:369865
x1,96:21185353,14927134
x1,96:22062343,14927134
k1,96:22432209,14927134:369866
x1,96:22774449,14927134
x1,96:24806499,14927134
k1,96:25488295,14927134:681796
x1,96:26814475,14927134
k1,96:27184340,14927134:369865
x1,96:29580020,14927134
x1,96:29965040,14927134
k1,96:30334906,14927134:369866
x1,96:30955216,14927134
k1,96:31325081,14927134:369865
x1,96:32137901,14927134
k1,96:32507767,14927134:369866
x1,96:33534487,14927134
k1,96:33904352,14927134:369865
x1,96:34421990,14927134
k1,96:34421990,14927134:0
)
(1,97:4736286,15877406:29685704,546132,152916
x1,97:8115906,15877406
g1,96:8372586,15877406
x1,96:10344744,15877406
k1,97:34421990,15877406:24077246
g1,97:34421990,15877406
)
(1,98:4736286,16827678:29685704,0,0
h1,98:4736286,16827678:1155060,0,0
k1,98:34421990,16827678:28530644
g1,98:34421990,16827678
)
(1,101:17505159,17777950:16916831,870630,692370
(1,101:17505159,17777950:4147959,870630,692370
x1,101:17968458,17777950
(1,101:17968458,17895914:222426,346600,0
x1,101:18158116,17895914
)
g1,101:18409334,17777950
x1,101:19008254,17777950
g1,101:19226704,17777950
(1,101:19226704,17777950:2212514,870630,692370
(1,101:19226704,17777950:2212514,870630,692370
h1,101:19226704,17777950:78643,0,0
[1,101:19305347,17777950:2055228,870630,692370
(1,101:19305347,17245923:2055228,338603,0
k1,101:19954267,17245923:648920
x1,101:20326543,17245923
x1,101:20711655,17245923
k1,101:21360575,17245923:648920
)
(1,101:19305347,18317404:2055228,506811,152916
x1,101:20127179,18317404
x1,101:20535319,18317404
x1,101:20910555,18317404
(1,99:20910555,18435368:450020,358263,0
x1,99:21327807,18435368
)
)
]
h1,101:21360575,17777950:78643,0,0
)
)
(1,101:21439218,17777950:213900,76458,152916
(1,99:21439218,17777950:213900,76458,152916
x1,99:21653118,17777950
)
)
)
(1,101:33438050,17777950:983940,589824,196608
(1,101:33438050,17777950:983940,589824,196608
x1,101:34122530,17777950
x1,101:34421990,17777950
)
)
)
(1,105:4736286,19507972:29685704,546132,152916
h1,103:4736286,19507972:1155060,0,0
x1,103:7859226,19507972
k1,103:8171663,19507972:312437
$1,103:8171663,19507972
x1,103:8551586,19507972
$1,103:8579803,19507972
k1,103:8892241,19507972:312438
x1,103:9409879,19507972
k1,103:9722316,19507972:312437
x1,103:10791816,19507972
k1,103:11104254,19507972:312438
x1,103:12413322,19507972
x1,103:13161972,19507972
x1,103:13440042,19507972
k1,103:13752479,19507972:312437
x1,103:16220885,19507972
x1,103:16605905,19507972
k1,103:16918343,19507972:312438
x1,103:18158963,19507972
k1,103:18471400,19507972:312437
$1,103:18471400,19507972
x1,103:18818419,19507972
(1,103:18818419,19625936:450020,358263,0
x1,103:19235671,19625936
)
$1,103:19268439,19507972
k1,103:19580877,19507972:312438
x1,103:20098515,19507972
k1,103:20410952,19507972:312437
x1,103:21480452,19507972
k1,103:21792890,19507972:312438
x1,103:24316910,19507972
k1,103:24629347,19507972:312437
x1,103:25057147,19507972
x1,103:26554447,19507972
x1,103:29420707,19507972
k1,103:29733145,19507972:312438
x1,103:32004763,19507972
k1,103:32514275,19507972:509512
x1,103:34421990,19507972
k1,104:34421990,19507972:0
)
(1,105:4736286,20458244:29685704,546132,152916
x1,105:5880515,20458244
k1,104:6213442,20458244:332927
x1,104:6598462,20458244
h1,104:6598462,20458244:0,0,0
k1,104:6827205,20458244:228743
x1,104:8067825,20458244
k1,104:8296567,20458244:228742
x1,104:9440796,20458244
k1,104:9773723,20458244:332927
x1,104:10158743,20458244
h1,104:10158743,20458244:0,0,0
k1,104:10387485,20458244:228742
x1,104:10900845,20458244
k1,104:11129588,20458244:228743
x1,104:11647226,20458244
k1,104:11875968,20458244:228742
x1,104:12303768,20458244
x1,104:14515494,20458244
k1,104:14744236,20458244:228742
x1,104:15428716,20458244
k1,104:15657458,20458244:228742
x1,104:16919468,20458244
k1,104:17148211,20458244:228743
x1,104:20917129,20458244
k1,104:21145871,20458244:228742
x1,104:22386491,20458244
k1,104:22615233,20458244:228742
x1,104:26165973,20458244
k1,104:26394715,20458244:228742
x1,104:28041745,20458244
x1,104:29693053,20458244
k1,104:29921796,20458244:228743
x1,104:31162416,20458244
k1,104:31391158,20458244:228742
x1,104:33273478,20458244
k1,104:33502220,20458244:228742
x1,104:34421990,20458244
k1,104:34421990,20458244:0
)
(1,105:4736286,21408516:29685704,602150,152916
x1,105:5121306,21408516
g1,104:5377986,21408516
x1,104:8868834,21408516
g1,104:9125514,21408516
$1,104:9125514,21408516
x1,104:9497790,21408516
(1,104:9526007,21123126:466040,316760,54616
x1,104:9959279,21123126
)
g1,104:10210497,21408516
x1,104:10424397,21408516
g1,104:10642847,21408516
x1,104:11015123,21408516
(1,104:11043340,21123126:466040,316760,54616
x1,104:11476612,21123126
)
$1,104:11509380,21408516
g1,104:11766060,21408516
x1,104:15252630,21408516
g1,104:15509310,21408516
x1,104:16653539,21408516
g1,104:16995779,21408516
x1,104:17380799,21408516
h1,104:17380799,21408516:0,0,0
g1,104:17637479,21408516
x1,104:18065279,21408516
x1,104:20657747,21408516
k1,105:34421990,21408516:13764243
g1,105:34421990,21408516
)
(1,106:4736286,22358788:29685704,0,0
h1,106:4736286,22358788:1155060,0,0
k1,106:34421990,22358788:28530644
g1,106:34421990,22358788
)
(1,109:16325255,23309060:18096735,642257,201543
(1,109:16325255,23309060:6507766,642257,201543
x1,109:16859732,23309060
[1,109:16859732,23503479:525508,758520,0
(1,109:16859732,22984349:311300,239390,0
x1,109:17138264,22984349
)
(1,109:16859732,23503479:525508,225735,0
x1,109:17352472,23503479
)
]
g1,109:17603690,23309060
x1,109:18202610,23309060
g1,109:18421060,23309060
x1,109:18793336,23309060
x1,109:19584312,23309060
[1,109:19584312,23510603:466040,843800,0
(1,109:19584312,22983563:466040,316760,54616
x1,109:20017584,22983563
)
(1,109:19584312,23510603:222426,346600,0
x1,109:19773970,23510603
)
]
g1,109:20225112,23309060
x1,109:20824032,23309060
g1,109:20998792,23309060
x1,109:21462091,23309060
[1,109:21462091,23510603:466040,843800,0
(1,109:21462091,22983563:466040,316760,54616
x1,109:21895363,22983563
)
(1,109:21462091,23510603:222426,346600,0
x1,109:21651749,23510603
)
]
x1,109:22726071,23309060
)
(1,109:33438050,23309060:983940,589824,196608
(1,109:33438050,23309060:983940,589824,196608
x1,109:34122530,23309060
x1,109:34421990,23309060
)
)
)
(1,113:4736286,24685316:29685704,546132,152916
h1,112:4736286,24685316:1155060,0,0
x1,112:7217526,24685316
k1,112:7496628,24685316:279102
x1,112:9661296,24685316
k1,112:9940397,24685316:279101
x1,112:10624877,24685316
x1,112:11330747,24685316
k1,112:11609849,24685316:279102
x1,112:13877189,24685316
x1,112:16165919,24685316
k1,112:16445021,24685316:279102
x1,112:17642861,24685316
x1,112:20316611,24685316
k1,112:20595712,24685316:279101
x1,112:21216022,24685316
k1,112:21495124,24685316:279102
x1,112:22564624,24685316
k1,112:22843726,24685316:279102
x1,112:24768826,24685316
k1,112:25047927,24685316:279101
x1,112:28833957,24685316
x1,112:29218977,24685316
x1,112:29368707,24685316
k1,112:29653415,24685316:284708
x1,112:31069433,24685316
k1,112:31348534,24685316:279101
x1,112:31990234,24685316
k1,112:32269336,24685316:279102
x1,112:33413565,24685316
k1,112:33823070,24685316:409505
x1,112:34208090,24685316
h1,112:34208090,24685316:0,0,0
x1,112:34421990,24685316
k1,112:34421990,24685316:0
)
(1,113:4736286,25635588:29685704,546132,152916
x1,113:5891346,25635588
k1,112:6114365,25635588:223019
x1,112:6542165,25635588
x1,112:6905795,25635588
k1,112:7128813,25635588:223018
x1,112:10315923,25635588
k1,112:10538942,25635588:223019
x1,112:11180642,25635588
k1,112:11403661,25635588:223019
x1,112:13290259,25635588
k1,112:13513277,25635588:223018
x1,112:14133587,25635588
k1,112:14356606,25635588:223019
x1,112:15426106,25635588
k1,112:15649125,25635588:223019
x1,112:17231985,25635588
k1,112:17455003,25635588:223018
x1,112:21309481,25635588
k1,112:21532500,25635588:223019
x1,112:23885400,25635588
k1,112:24108419,25635588:223019
x1,112:25177919,25635588
x1,112:25584329,25635588
k1,112:25807347,25635588:223018
x1,112:27047967,25635588
k1,112:27378987,25635588:331020
x1,112:29367984,25635588
k1,112:29591003,25635588:223019
x1,112:30660503,25635588
k1,112:30883521,25635588:223018
x1,112:31995801,25635588
x1,112:33172251,25635588
k1,112:33395270,25635588:223019
x1,112:34421990,25635588
k1,112:34421990,25635588:0
)
(1,113:4736286,26585860:29685704,546132,152916
x1,113:5763006,26585860
x1,112:6148026,26585860
x1,112:6986514,26585860
k1,112:7213086,26585860:226572
x1,112:8282586,26585860
k1,112:8501632,26585860:219046
x1,112:10084492,26585860
k1,112:10303537,26585860:219045
x1,112:14158015,26585860
k1,112:14377061,26585860:219046
x1,112:16729961,26585860
k1,112:16949006,26585860:219045
x1,112:17462366,26585860
k1,112:17681411,26585860:219045
x1,112:18969089,26585860
k1,112:19188135,26585860:219046
x1,112:20214855,26585860
x1,112:20599875,26585860
x1,112:21438363,26585860
k1,112:21664935,26585860:226572
x1,112:22477755,26585860
x1,112:23012505,26585860
x1,112:23739765,26585860
x1,112:24360075,26585860
k1,112:24579120,26585860:219045
x1,112:25092480,26585860
k1,112:25311526,26585860:219046
x1,112:26124346,26585860
x1,112:26791714,26585860
k1,112:27010759,26585860:219045
x1,112:28123039,26585860
k1,112:28342085,26585860:219046
x1,112:29368805,26585860
x1,112:29753825,26585860
x1,112:30074675,26585860
k1,112:30293720,26585860:219045
x1,112:34421990,26585860
k1,112:34421990,26585860:0
)
(1,113:4736286,27536132:29685704,546132,152916
x1,113:5976906,27536132
k1,112:6216827,27536132:239921
x1,112:6944087,27536132
x1,112:7654235,27536132
k1,112:7894156,27536132:239921
x1,112:8963656,27536132
k1,112:9203577,27536132:239921
x1,112:13058055,27536132
k1,112:13297975,27536132:239920
x1,112:13725775,27536132
x1,112:16104343,27536132
k1,112:16344264,27536132:239921
x1,112:19980564,27536132
k1,112:20220485,27536132:239921
x1,112:21486773,27536132
k1,112:21726694,27536132:239921
x1,112:22368394,27536132
k1,112:22608315,27536132:239921
x1,112:23955885,27536132
x1,112:24233955,27536132
k1,112:24473876,27536132:239921
x1,112:25094186,27536132
k1,112:25334107,27536132:239921
x1,112:26574727,27536132
k1,112:26814647,27536132:239920
x1,112:27242447,27536132
x1,112:29103377,27536132
k1,112:29343298,27536132:239921
x1,112:30412798,27536132
k1,112:30652719,27536132:239921
x1,112:31764999,27536132
x1,112:32941449,27536132
k1,112:33181370,27536132:239921
x1,112:34421990,27536132
k1,112:34421990,27536132:0
)
(1,113:4736286,28486404:29685704,546132,152916
x1,113:6062466,28486404
k1,112:6311845,28486404:249379
x1,112:7424125,28486404
x1,112:8343895,28486404
k1,112:8593274,28486404:249379
x1,112:9213584,28486404
k1,112:9462963,28486404:249379
x1,112:9805203,28486404
x1,112:11623353,28486404
k1,112:11872732,28486404:249379
x1,112:15278020,28486404
x1,112:16176400,28486404
k1,112:16425779,28486404:249379
x1,112:16853579,28486404
x1,112:19232147,28486404
k1,112:19481525,28486404:249378
x1,112:22565963,28486404
k1,112:22815342,28486404:249379
x1,112:24055962,28486404
k1,112:24305341,28486404:249379
x1,112:26662519,28486404
k1,112:26911898,28486404:249379
x1,112:27981398,28486404
k1,112:28230777,28486404:249379
x1,112:29257497,28486404
x1,112:30669237,28486404
k1,112:30918616,28486404:249379
x1,112:32159236,28486404
k1,112:32410075,28486404:250839
x1,112:33654973,28486404
k1,112:33904352,28486404:249379
x1,112:34421990,28486404
k1,112:34421990,28486404:0
)
(1,113:4736286,29436676:29685704,546132,152916
x1,113:5955516,29436676
x1,112:6918066,29436676
k1,112:7189822,29436676:271756
x1,112:7878580,29436676
k1,112:8150336,29436676:271756
x1,112:9219836,29436676
k1,112:9491592,29436676:271756
x1,112:12849822,29436676
k1,112:13121579,29436676:271757
x1,112:13463819,29436676
x1,112:15110849,29436676
k1,112:15498317,29436676:387468
x1,112:19690484,29436676
x1,112:19840214,29436676
k1,112:20115739,29436676:275525
x1,112:21185239,29436676
k1,112:21456995,29436676:271756
x1,112:22569275,29436676
x1,112:23745725,29436676
k1,112:24017481,29436676:271756
x1,112:25044201,29436676
k1,112:25315958,29436676:271757
x1,112:26492408,29436676
x1,112:29127656,29436676
k1,112:29399412,29436676:271756
x1,112:29784432,29436676
k1,112:30056188,29436676:271756
x1,112:32439034,29436676
k1,112:32710790,29436676:271756
x1,112:34421990,29436676
k1,112:34421990,29436676:0
)
(1,113:4736286,30386948:29685704,546132,152916
x1,113:6276366,30386948
x1,112:6682776,30386948
k1,112:6939178,30386948:256402
x1,112:7456816,30386948
k1,112:7713218,30386948:256402
x1,112:10836158,30386948
k1,112:11092560,30386948:256402
x1,112:11734260,30386948
k1,112:11990661,30386948:256401
x1,112:13060161,30386948
k1,112:13316563,30386948:256402
x1,112:16144321,30386948
k1,112:16400723,30386948:256402
x1,112:17021033,30386948
k1,112:17277435,30386948:256402
x1,112:18346935,30386948
k1,112:18603337,30386948:256402
x1,112:20186197,30386948
k1,112:20442599,30386948:256402
x1,112:24297077,30386948
k1,112:24553478,30386948:256401
x1,112:24981278,30386948
x1,112:27145946,30386948
k1,112:27402348,30386948:256402
x1,112:28471848,30386948
k1,112:28728250,30386948:256402
x1,112:30311110,30386948
k1,112:30567512,30386948:256402
x1,112:34421990,30386948
k1,112:34421990,30386948:0
)
(1,113:4736286,31337220:29685704,546132,152916
x1,113:5763006,31337220
x1,112:6148026,31337220
x1,112:6772614,31337220
k1,112:7006358,31337220:233744
x1,112:7648058,31337220
k1,112:7881803,31337220:233745
x1,112:8951303,31337220
k1,112:9185047,31337220:233744
x1,112:10425667,31337220
x1,112:11991415,31337220
k1,112:12225159,31337220:233744
x1,112:15176979,31337220
k1,112:15410724,31337220:233745
x1,112:16095204,31337220
k1,112:16328948,31337220:233744
x1,112:17398448,31337220
k1,112:17632193,31337220:233745
x1,112:18744473,31337220
x1,112:19920923,31337220
k1,112:20154667,31337220:233744
x1,112:21395287,31337220
k1,112:21729882,31337220:334595
x1,112:23056062,31337220
k1,112:23289806,31337220:233744
x1,112:26412746,31337220
k1,112:26646491,31337220:233745
x1,112:29029337,31337220
k1,112:29263081,31337220:233744
x1,112:30760381,31337220
k1,112:30994125,31337220:233744
x1,112:31511763,31337220
k1,112:31745508,31337220:233745
x1,112:32964738,31337220
x1,112:33499488,31337220
k1,112:33733232,31337220:233744
x1,112:34421990,31337220
k1,112:34421990,31337220:0
)
(1,113:4736286,32287492:29685704,546132,152916
x1,113:5805786,32287492
k1,112:6082775,32287492:276989
x1,112:11045255,32287492
k1,112:11322244,32287492:276989
x1,112:11664484,32287492
x1,112:13311514,32287492
k1,112:13593580,32287492:282066
x1,112:15133660,32287492
x1,112:15540070,32287492
k1,112:15817060,32287492:276990
x1,112:18302578,32287492
k1,112:18579567,32287492:276989
x1,112:19649067,32287492
k1,112:19926056,32287492:276989
x1,112:22321736,32287492
x1,112:22706756,32287492
k1,112:22983745,32287492:276989
x1,112:24224365,32287492
k1,112:24501354,32287492:276989
x1,112:26383674,32287492
k1,112:26660663,32287492:276989
x1,112:27730163,32287492
k1,112:28007152,32287492:276989
x1,112:31793182,32287492
x1,112:32178202,32287492
k1,112:32455191,32287492:276989
x1,112:33075501,32287492
k1,112:33352490,32287492:276989
x1,112:34421990,32287492
k1,112:34421990,32287492:0
)
(1,113:4736286,33237764:29685704,623265,0
x1,113:6066744,33237764
$1,112:6132280,33237764
(1,112:6132280,32952374:311300,337875,0
(1,112:6132280,32952374:278532,337875,0
x1,112:6410812,32952374
)
)
$1,112:6443580,33237764
x1,112:6657480,33237764
k1,113:34421990,33237764:27764510
g1,113:34421990,33237764
)
(1,115:4736286,34188036:29685704,546132,152916
h1,114:4736286,34188036:1155060,0,0
x1,114:7217526,34188036
k1,114:7445864,34188036:228338
x1,114:8376193,34188036
x1,114:8803993,34188036
x1,114:9189013,34188036
x1,114:9509863,34188036
k1,114:9738202,34188036:228339
x1,114:10315459,34188036
x1,114:10721869,34188036
x1,114:11085499,34188036
x1,114:11470519,34188036
x1,114:12005269,34188036
k1,114:12233607,34188036:228338
x1,114:13260327,34188036
x1,114:14975805,34188036
k1,114:15204144,34188036:228339
x1,114:16273644,34188036
x1,114:17364534,34188036
k1,114:17592872,34188036:228338
x1,114:18277352,34188036
x1,114:20591750,34188036
k1,114:20820088,34188036:228338
x1,114:21504568,34188036
k1,114:21732907,34188036:228339
x1,114:22952137,34188036
x1,114:23379937,34188036
x1,114:24513607,34188036
k1,114:24741945,34188036:228338
x1,114:26457423,34188036
k1,114:26685762,34188036:228339
x1,114:28054722,34188036
x1,114:28910322,34188036
x1,114:30707082,34188036
k1,114:30935420,34188036:228338
x1,114:32090480,34188036
x1,114:32774960,34188036
x1,114:33202760,34188036
x1,114:34165310,34188036
x1,114:34421990,34188036
k1,115:34421990,34188036:0
)
(1,115:4736286,35138308:29685704,623265,152916
x1,115:6062466,35138308
g1,114:6319146,35138308
x1,114:6661386,35138308
x1,114:8398254,35138308
g1,114:8654934,35138308
x1,114:9895554,35138308
g1,114:10152234,35138308
x1,114:11824932,35138308
g1,114:12081612,35138308
x1,114:12766092,35138308
g1,114:13022772,35138308
x1,114:14092272,35138308
g1,114:14348952,35138308
x1,114:17732577,35138308
x1,114:18395667,35138308
x1,114:19229877,35138308
x1,114:19550727,35138308
g1,114:19807407,35138308
x1,114:20556057,35138308
x1,114:21929295,35138308
x1,114:23777391,35138308
$1,114:23842927,35138308
(1,114:23842927,34852918:311300,337875,0
(1,114:23842927,34852918:278532,337875,0
x1,114:24121459,34852918
)
)
$1,114:24154227,35138308
k1,115:34421990,35138308:10267763
g1,115:34421990,35138308
)
(1,116:4736286,36088580:29685704,0,0
h1,116:4736286,36088580:1155060,0,0
k1,116:34421990,36088580:28530644
g1,116:34421990,36088580
)
(1,119:16993294,37038852:17428696,589824,196608
(1,119:16993294,37038852:5171688,564101,194419
x1,119:17648422,37038852
g1,119:17923350,37038852
x1,119:18522270,37038852
g1,119:18740720,37038852
x1,119:19317977,37038852
g1,119:19492737,37038852
x1,119:20091657,37038852
g1,119:20266417,37038852
x1,119:20851411,37038852
x1,119:21425574,37038852
[1,119:21425574,37233271:525508,758520,0
(1,119:21425574,36714141:311300,239390,0
x1,119:21704106,36714141
)
(1,119:21425574,37233271:525508,225735,0
x1,119:21918314,37233271
)
]
(1,119:21951082,37038852:213900,76458,152916
(1,117:21951082,37038852:213900,76458,152916
x1,117:22164982,37038852
)
)
)
(1,119:33438050,37038852:983940,589824,196608
(1,119:33438050,37038852:983940,589824,196608
x1,119:34122530,37038852
x1,119:34421990,37038852
)
)
)
(1,122:4736286,38415108:29685704,546132,0
h1,121:4736286,38415108:1155060,0,0
x1,121:7388646,38415108
k1,122:34421990,38415108:27033344
g1,122:34421990,38415108
)
(1,125:15640597,39806664:18781393,1326020,747120
(1,125:15640597,39806664:7877083,1326020,747120
x1,125:16217854,39806664
g1,125:16436304,39806664
x1,125:17035224,39806664
g1,125:17253674,39806664
(1,125:17253674,39806664:2142704,1155292,692370
(1,125:17253674,39806664:2142704,1155292,692370
h1,125:17253674,39806664:78643,0,0
[1,125:17332317,39806664:1985418,1155292,692370
(1,125:17332317,39274637:1985418,623265,0
x1,125:17704593,39274637
(1,125:17732810,38989247:311300,337875,0
x1,125:18011342,38989247
)
x1,125:18899485,39274637
(1,125:19006435,38989247:311300,337875,0
x1,125:19284967,38989247
)
)
(1,125:17332317,40346118:1985418,506811,152916
k1,125:17695932,40346118:363615
x1,125:18517764,40346118
x1,125:18925904,40346118
k1,125:19317735,40346118:363614
)
]
h1,125:19317735,39806664:78643,0,0
)
)
g1,125:19527448,39806664
(1,125:19527448,39806664:2776898,1140335,747120
(1,125:19527448,38697785:578904,31456,1855999
x1,125:20106352,38697785
)
(1,125:20106352,39806664:1619090,1038838,539454
(1,125:20106352,39806664:1619090,1038838,539454
h1,125:20106352,39806664:78643,0,0
[1,125:20184995,39806664:1461804,1038838,539454
(1,125:20184995,39274637:1461804,506811,0
k1,125:20723387,39274637:538392
x1,125:21108407,39274637
k1,125:21646799,39274637:538392
)
(1,125:20184995,40346118:1461804,537395,0
x1,125:21082046,40346118
x1,125:21539849,40346118
)
]
h1,125:21646799,39806664:78643,0,0
)
)
(1,125:21725442,38697785:578904,31456,1855999
x1,125:22304346,38697785
)
)
(1,125:22304346,38873860:868364,393216,131072
x1,125:23139942,38873860
)
g1,125:23303780,39806664
(1,125:23303780,39806664:213900,76458,152916
(1,123:23303780,39806664:213900,76458,152916
x1,123:23517680,39806664
)
)
)
(1,125:33438050,39806664:983940,589824,196608
(1,125:33438050,39806664:983940,589824,196608
x1,125:34122530,39806664
x1,125:34421990,39806664
)
)
)
(1,127:4736286,41182920:29685704,0,0
h1,127:4736286,41182920:1155060,0,0
k1,127:34421990,41182920:28530644
g1,127:34421990,41182920
)
(1,129:15695340,42403748:18726650,1155292,747120
(1,129:15695340,42403748:7767597,1155292,747120
x1,129:16280334,42403748
g1,129:16538470,42403748
x1,129:17137390,42403748
g1,129:17355840,42403748
(1,129:17355840,42403748:2854159,1155292,539454
(1,129:17355840,42403748:2854159,1155292,539454
h1,129:17355840,42403748:78643,0,0
[1,129:17434483,42403748:2696873,1155292,539454
(1,129:17434483,41871721:2696873,623265,0
k1,129:17782160,41871721:347677
x1,129:18481838,41871721
(1,129:18510055,41586331:311300,337875,0
x1,129:18788587,41586331
)
x1,129:19676730,41871721
k1,129:20131356,41871721:347676
)
(1,129:17434483,42943202:2696873,537395,0
x1,129:18641335,42943202
x1,129:19566603,42943202
x1,129:20024406,42943202
)
]
h1,129:20131356,42403748:78643,0,0
)
)
g1,129:20341069,42403748
(1,129:20341069,42403748:2776898,1140335,747120
(1,129:20341069,41294869:578904,31456,1855999
x1,129:20919973,41294869
)
(1,129:20919973,42403748:1619090,1038838,539454
(1,129:20919973,42403748:1619090,1038838,539454
h1,129:20919973,42403748:78643,0,0
[1,129:20998616,42403748:1461804,1038838,539454
(1,129:20998616,41871721:1461804,506811,0
k1,129:21537008,41871721:538392
x1,129:21922028,41871721
k1,129:22460420,41871721:538392
)
(1,129:20998616,42943202:1461804,537395,0
x1,129:21895667,42943202
x1,129:22353470,42943202
)
]
h1,129:22460420,42403748:78643,0,0
)
)
(1,129:22539063,41294869:578904,31456,1855999
x1,129:23117967,41294869
)
)
g1,129:23249037,42403748
(1,129:23249037,42403748:213900,76458,152916
(1,128:23249037,42403748:213900,76458,152916
x1,128:23462937,42403748
)
)
)
(1,129:33438050,42403748:983940,589824,196608
(1,129:33438050,42403748:983940,589824,196608
x1,129:34122530,42403748
x1,129:34421990,42403748
)
)
)
(1,132:4736286,44188520:29685704,546132,152916
h1,131:4736286,44188520:1155060,0,0
x1,131:7859226,44188520
k1,131:8200546,44188520:341320
$1,131:8200546,44188520
x1,131:8511475,44188520
$1,131:8511475,44188520
k1,131:8852795,44188520:341320
x1,131:9370433,44188520
k1,131:9711753,44188520:341320
x1,131:10781253,44188520
k1,131:11122574,44188520:341321
x1,131:13518254,44188520
k1,131:13859574,44188520:341320
x1,131:14287374,44188520
x1,131:17538654,44188520
x1,131:17923674,44188520
k1,131:18264994,44188520:341320
x1,131:18885304,44188520
k1,131:19226624,44188520:341320
x1,131:20296124,44188520
k1,131:20637444,44188520:341320
x1,131:21946512,44188520
x1,131:22695162,44188520
x1,131:23187132,44188520
k1,131:23549612,44188520:362480
$1,131:23549612,44188520
x1,131:24135734,44188520
$1,131:24142208,44188520
k1,131:24483528,44188520:341320
x1,131:25001166,44188520
k1,131:25342486,44188520:341320
x1,131:26411986,44188520
k1,131:26753307,44188520:341321
x1,131:27827085,44188520
k1,131:28168405,44188520:341320
x1,131:30739483,44188520
x1,131:31231453,44188520
k1,131:31593933,44188520:362480
$1,131:31593933,44188520
x1,131:32045262,44188520
$1,131:32152212,44188520
k1,131:32493532,44188520:341320
x1,131:33011170,44188520
k1,131:33352490,44188520:341320
x1,131:34421990,44188520
k1,131:34421990,44188520:0
)
(1,132:4736286,45138792:29685704,546132,152916
x1,132:6447486,45138792
x1,131:9078456,45138792
k1,131:9414112,45138792:335656
x1,131:12194812,45138792
k1,131:12431740,45138792:236928
x1,131:13351510,45138792
k1,131:13588438,45138792:236928
x1,131:13973458,45138792
k1,131:14210385,45138792:236927
x1,131:15194325,45138792
k1,131:15431253,45138792:236928
x1,131:19131723,45138792
k1,131:19467379,45138792:335656
x1,131:20793559,45138792
k1,131:21030487,45138792:236928
x1,131:24196207,45138792
x1,131:24474277,45138792
k1,131:24711205,45138792:236928
x1,131:25331515,45138792
k1,131:25568443,45138792:236928
x1,131:26637943,45138792
k1,131:26874870,45138792:236927
x1,131:28232999,45138792
x1,131:28618019,45138792
x1,131:28938869,45138792
k1,131:29175797,45138792:236928
x1,131:29753054,45138792
x1,131:30159464,45138792
x1,131:30523094,45138792
x1,131:30908114,45138792
x1,131:31442864,45138792
k1,131:31679792,45138792:236928
x1,131:34421990,45138792
k1,131:34421990,45138792:0
)
(1,132:4736286,46089064:29685704,623265,152916
x1,132:6896676,46089064
g1,131:7153356,46089064
x1,131:8650656,46089064
g1,131:8907336,46089064
x1,131:10083786,46089064
x1,131:12372516,46089064
x1,131:13249506,46089064
g1,131:13506186,46089064
x1,131:18152094,46089064
g1,131:18408774,46089064
x1,131:18926412,46089064
g1,131:19183092,46089064
x1,131:19953132,46089064
x1,131:20359542,46089064
x1,131:20808732,46089064
g1,131:21065412,46089064
x1,131:21749892,46089064
g1,131:22006572,46089064
x1,131:22412982,46089064
x1,131:23439702,46089064
g1,131:23696382,46089064
x1,131:24295302,46089064
x1,131:24830052,46089064
g1,131:25086732,46089064
x1,131:27011832,46089064
g1,131:27268512,46089064
x1,131:29535852,46089064
x1,131:32128320,46089064
$1,131:32193856,46089064
(1,131:32193856,45803674:311300,337875,0
(1,131:32193856,45803674:278532,337875,0
x1,131:32472388,45803674
)
)
$1,131:32505156,46089064
x1,131:32719056,46089064
k1,132:34421990,46089064:1702934
g1,132:34421990,46089064
)
(1,135:4736286,47039336:29685704,546132,152916
h1,134:4736286,47039336:1155060,0,0
x1,134:7217526,47039336
k1,134:7584036,47039336:366510
x1,134:8942165,47039336
x1,134:9327185,47039336
x1,134:9648035,47039336
k1,134:10014544,47039336:366509
x1,134:10591801,47039336
x1,134:10998211,47039336
x1,134:11361841,47039336
x1,134:11746861,47039336
x1,134:12281611,47039336
k1,134:12648121,47039336:366510
x1,134:15390319,47039336
k1,134:15756828,47039336:366509
x1,134:17917218,47039336
k1,134:18283728,47039336:366510
x1,134:19438788,47039336
k1,134:19805297,47039336:366509
x1,134:20233097,47039336
x1,134:20596727,47039336
k1,134:20963237,47039336:366510
x1,134:22464815,47039336
k1,134:22831324,47039336:366509
x1,134:23515804,47039336
k1,134:23882314,47039336:366510
x1,134:26235214,47039336
k1,134:26601723,47039336:366509
x1,134:27671223,47039336
k1,134:28037733,47039336:366510
x1,134:32683641,47039336
k1,134:33050151,47039336:366510
x1,134:33670461,47039336
k1,134:34036970,47039336:366509
x1,134:34421990,47039336
k1,134:34421990,47039336:0
)
(1,135:4736286,47989608:29685704,546132,152916
x1,135:6199362,47989608
x1,134:8321250,47989608
k1,134:8554841,47989608:233591
x1,134:9175151,47989608
k1,134:9408742,47989608:233591
x1,134:9750982,47989608
x1,134:11996932,47989608
k1,134:12230522,47989608:233590
x1,134:15054002,47989608
k1,134:15287593,47989608:233591
x1,134:18115351,47989608
k1,134:18348942,47989608:233591
x1,134:18990642,47989608
k1,134:19224233,47989608:233591
x1,134:21880871,47989608
k1,134:22114461,47989608:233590
x1,134:23872719,47989608
k1,134:24106310,47989608:233591
$1,134:24106310,47989608
x1,134:24453329,47989608
(1,134:24453329,48107572:450020,358263,0
x1,134:24870581,48107572
)
$1,134:24903349,47989608
k1,134:25136940,47989608:233591
x1,134:26377560,47989608
k1,134:26611151,47989608:233591
$1,134:26611151,47989608
x1,134:26991074,47989608
$1,134:27019291,47989608
k1,134:27252882,47989608:233591
x1,134:28493502,47989608
k1,134:28727092,47989608:233590
x1,134:31815808,47989608
k1,134:32049399,47989608:233591
x1,134:32434419,47989608
k1,134:32668010,47989608:233591
x1,134:34421990,47989608
k1,134:34421990,47989608:0
)
(1,135:4736286,48939880:29685704,546132,152916
x1,135:6195084,48939880
g1,134:6451764,48939880
x1,134:7072074,48939880
g1,134:7328754,48939880
$1,134:7328754,48939880
x1,134:7701030,48939880
g1,134:7947697,48939880
x1,134:8546617,48939880
g1,134:8765067,48939880
x1,134:9749007,48939880
$1,134:9749007,48939880
g1,134:10005687,48939880
x1,134:11246307,48939880
g1,134:11502987,48939880
$1,134:11502987,48939880
x1,134:11875263,48939880
g1,134:12121930,48939880
x1,134:12720850,48939880
g1,134:12939300,48939880
x1,134:13935991,48939880
$1,134:13935991,48939880
x1,134:14149891,48939880
k1,135:34421991,48939880:20272100
g1,135:34421991,48939880
)
]
(1,189:4736286,52610784:29685704,506811,0
(1,189:4736286,52610784:29685704,506811,0
k1,189:19386628,52610784:14650342
x1,189:19771648,52610784
k1,189:34421990,52610784:14650342
)
)
]
]
!36041
}2
Input:52:\\chm-fs.chm.bris.ac.uk\q\jsvd\phjsvd\JessPapers\Initiators\Supplementary_Info.bbl
!102
{3
[1,194:4736286,52610784:29685704,47874498,0
[1,194:4736286,52610784:29685704,50299330,0
[1,194:4736286,3097886:29685704,786432,0
(1,194:4736286,3097886:29685704,0,0
h1,194:4736286,3097886:29685704,0,0
)
]
[1,194:4736286,50644704:29685704,45908418,0
(52,4:4736286,5522718:29685704,786431,0
(52,4:4736286,5522718:0,0,0
g52,4:4736286,5522718
)
x52,4:10697964,5522718
k52,4:34421990,5522718:23724026
g52,4:34421990,5522718
)
(52,28:5934126,7251777:28487864,589824,196608
(52,21:5934126,7251777:0,589824,196608
g52,21:5934126,7251777
g52,21:5121306,7251777
g52,21:4736286,7251777
(52,21:4736286,7251777:812820,589824,196608
g52,21:4736286,7251777
g52,21:4736286,7251777
x52,21:5549106,7251777
)
g52,21:5934126,7251777
)
x52,21:6458045,7251777
k52,22:5934126,7251777:-64170
x52,22:6607775,7251777
k52,22:6870241,7251777:262466
x52,22:7447498,7251777
x52,22:9077416,7251777
k52,22:9339882,7251777:262466
x52,22:10580502,7251777
k52,22:10842968,7251777:262466
x52,22:11452447,7251777
k52,22:11714913,7251777:262466
x52,22:12484953,7251777
k52,22:12747419,7251777:262466
x52,22:13271338,7251777
x52,22:14875588,7251777
k52,22:15139501,7251777:263913
x52,22:15711127,7251777
x52,22:17519939,7251777
k52,22:17800510,7251777:280571
x52,22:19993440,7251777
x52,22:20543947,7251777
k52,22:20824519,7251777:280572
x52,22:24469263,7251777
k52,22:24733175,7251777:263912
x52,22:27086075,7251777
k52,22:27348541,7251777:262466
x52,22:28973908,7251777
x52,22:30411316,7251777
x52,22:30796336,7251777
k52,22:31058802,7251777:262466
x52,22:33045797,7251777
k52,23:33309710,7251777:263913
x52,23:34421990,7251777
k52,23:34421990,7251777:0
)
(52,28:5934126,8202049:28487864,546132,152916
x52,28:7559766,8202049
g52,23:7816446,8202049
x52,23:9570426,8202049
k52,28:34421990,8202049:24851564
g52,28:34421990,8202049
)
]
(1,194:4736286,52610784:29685704,506811,0
(1,194:4736286,52610784:29685704,506811,0
k1,194:19386628,52610784:14650342
x1,194:19771648,52610784
k1,194:34421990,52610784:14650342
)
)
]
]
!1988
}3
Input:53:\\chm-fs.chm.bris.ac.uk\q\jsvd\phjsvd\JessPapers\Initiators\Supplementary_Info.aux
!101
Postamble:
Count:1399
!27
Post scriptum:
